# Supplementary material for: Quadrangulosides A–F: new pregnane glycosides from Caralluma quadrangula
Source: Royal Society of Chemistry journal article supplement (doi:10.1039/d3ra01103h), 2023-01-01
Supplement: d3ra01103h1.pdf [file d3ra01103h1.pdf]

## Quadrangulosides A-F: New pregnane glycosides from *Caralluma quadrangula*

Ghada A. Ismail <sup>a</sup>, Mohamed E. Mostafa\*<sup>b</sup>, Ahmed Y. Mubarak<sup>c</sup>, AbelAziz M. Dawidar<sup>a</sup> and Mamdouh Abdel-Mogib<sup>a</sup>

<sup>a</sup> Chemistry Department, Faculty of Science, Mansoura University, Mansoura, 35516, Egypt.

<sup>b</sup> Plant Protection Research Institute, Agriculture Research Center, 12618, Egypt, Email: melhosieny80@gmail.com.

<sup>c</sup> Chemistry Department Faculty of Applied Sciences and Humanities, Amran University, Faculty of Medicine 21 September University of Medicals and Applied Sciences, Yemen.

### Supporting Information

| Contents                     | S1      |
|------------------------------|---------|
| Identification of compound 1 | S2-S6   |
| Identification of compound 2 | S6-S9   |
| Identification of compound 3 | S10-S13 |
| Identification of compound 4 | S13-S16 |
| Identification of compound 5 | S17-S20 |
| Identification of compound 6 | S21-S24 |

## Identification of compound 1

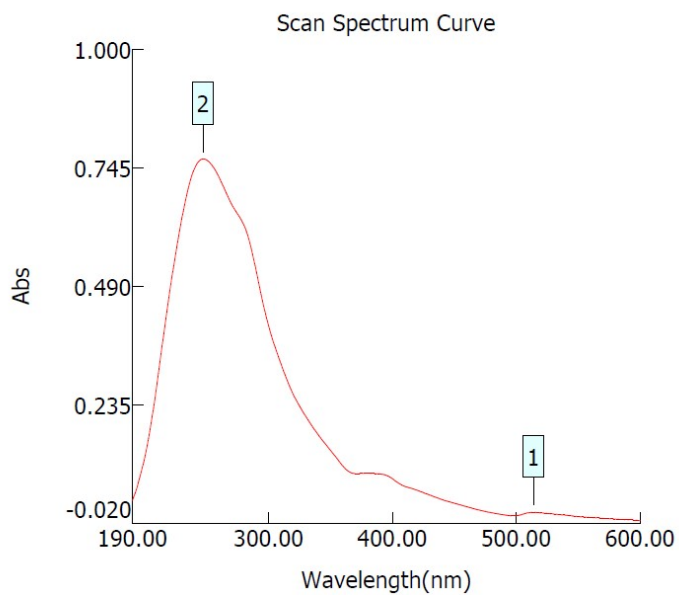

UV spectra of compound 1

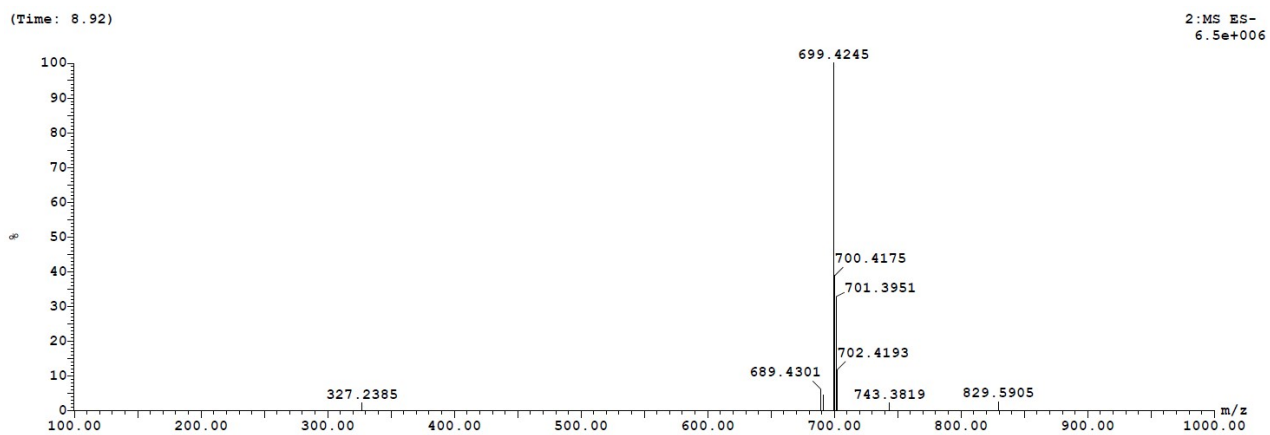

ESI-MS of compound 1

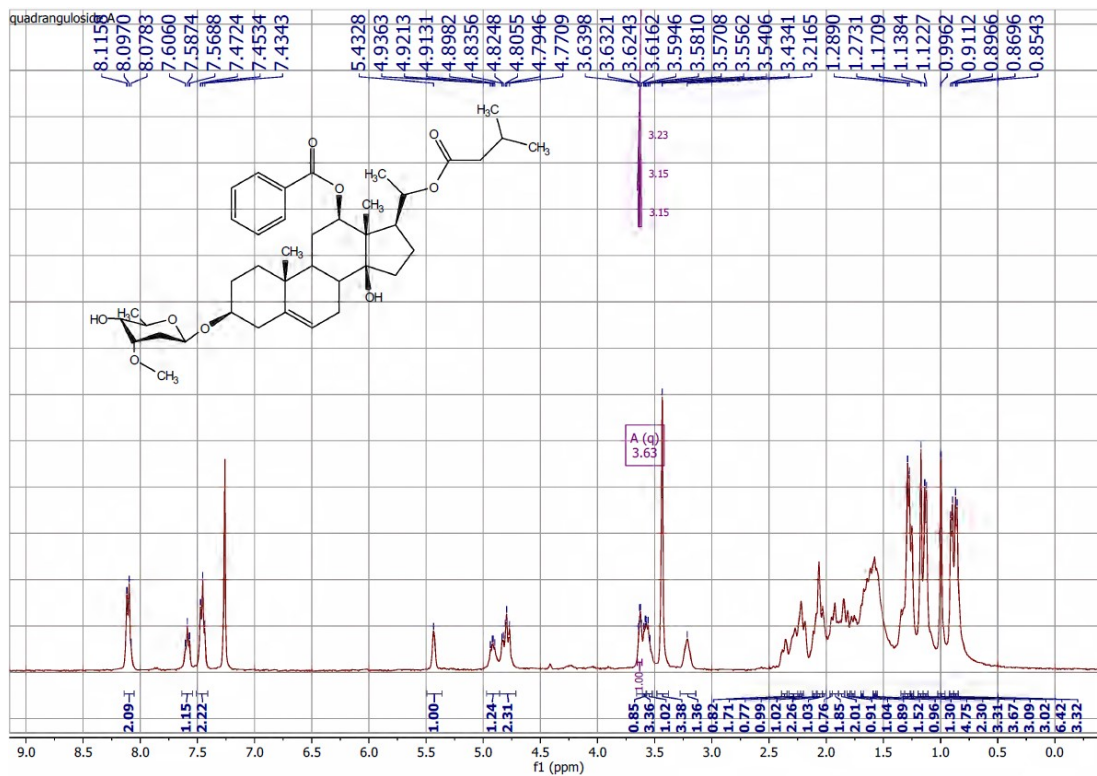

<sup>1</sup>H-NMR of Compound 1

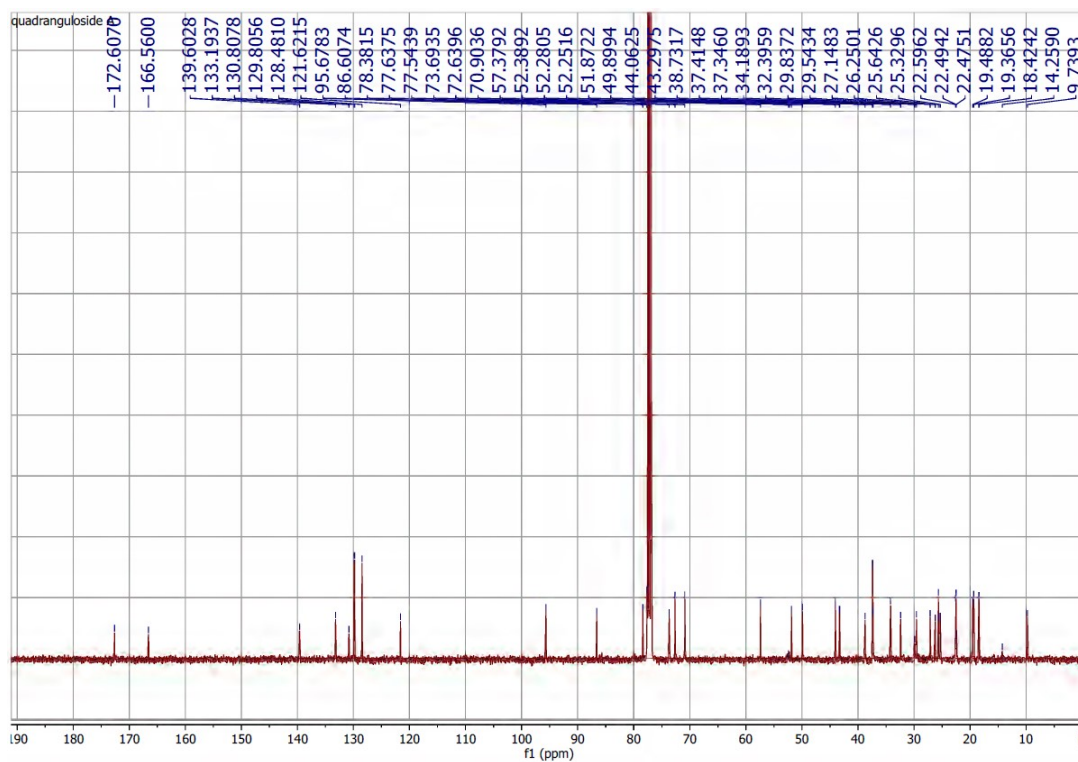

<sup>13</sup>C-NMR of Compound 1

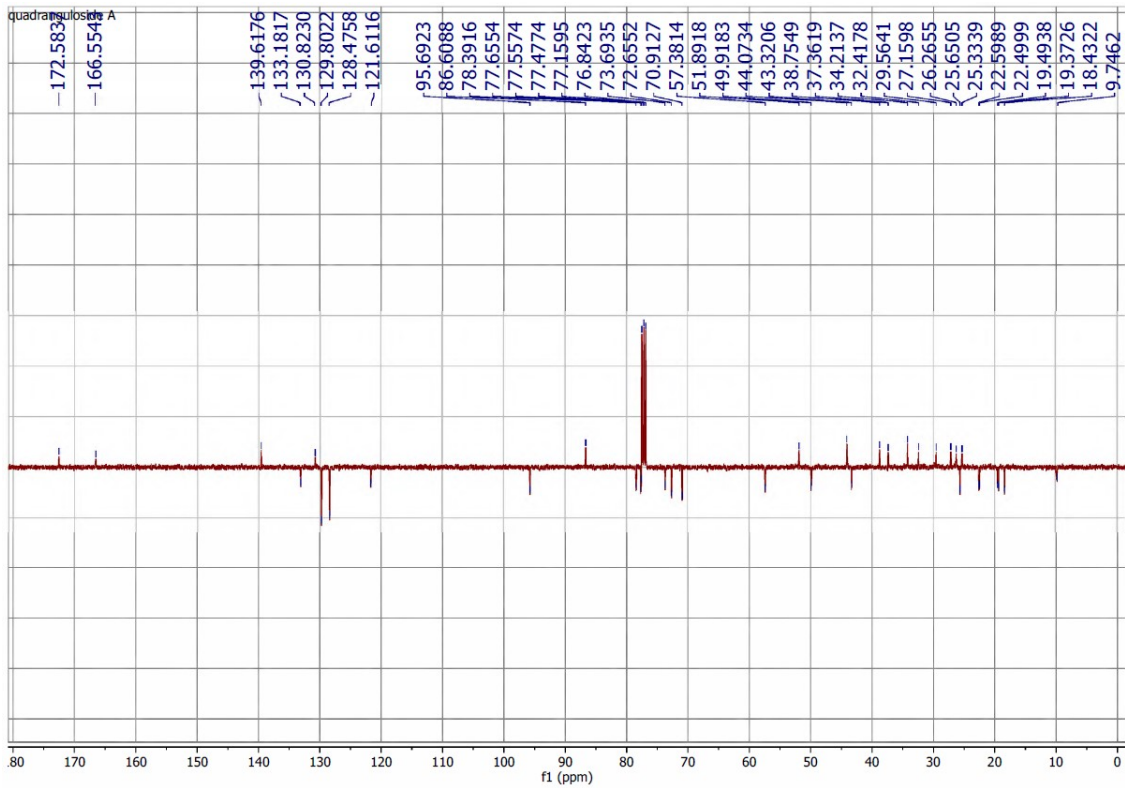

APT  $^{13}\text{C}$ -NMR of Compound 1

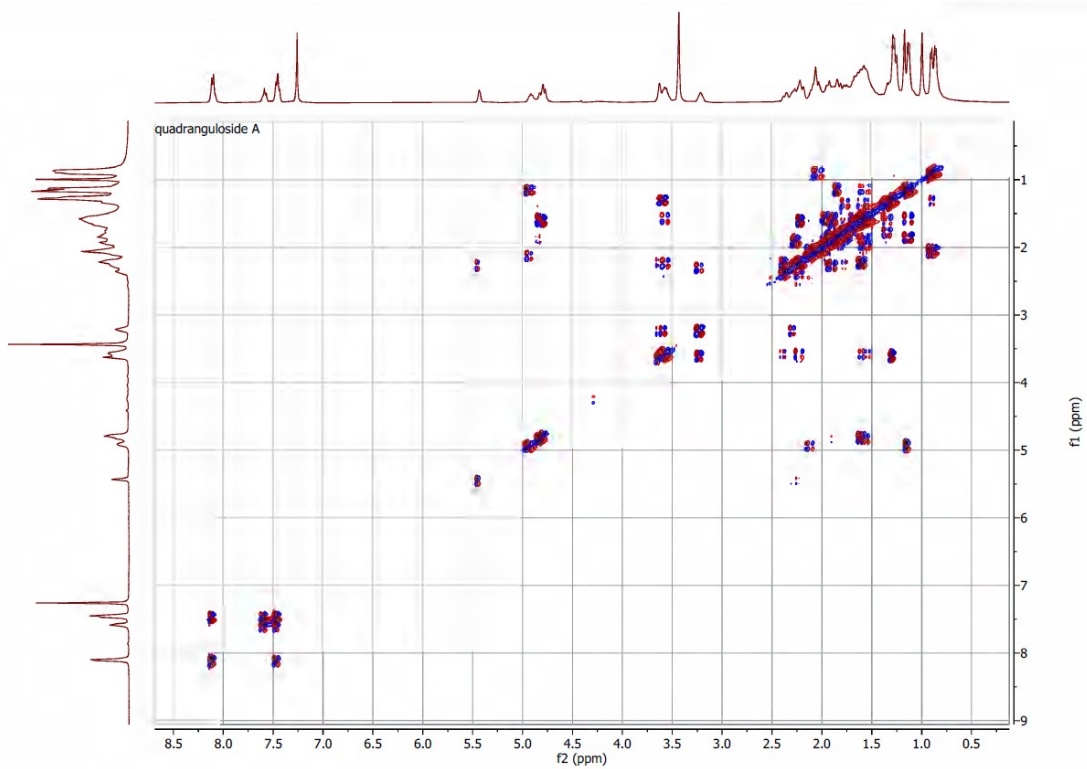

H, H COSY of Compound 1

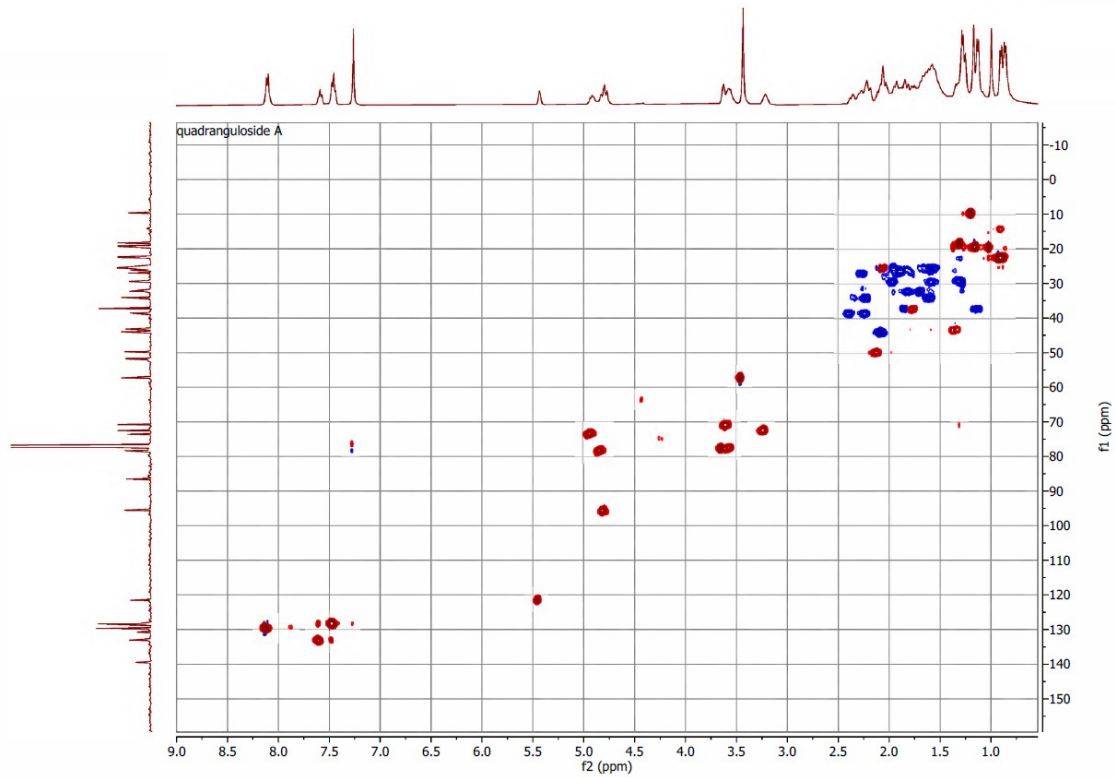

**HSQC of Compound 1**

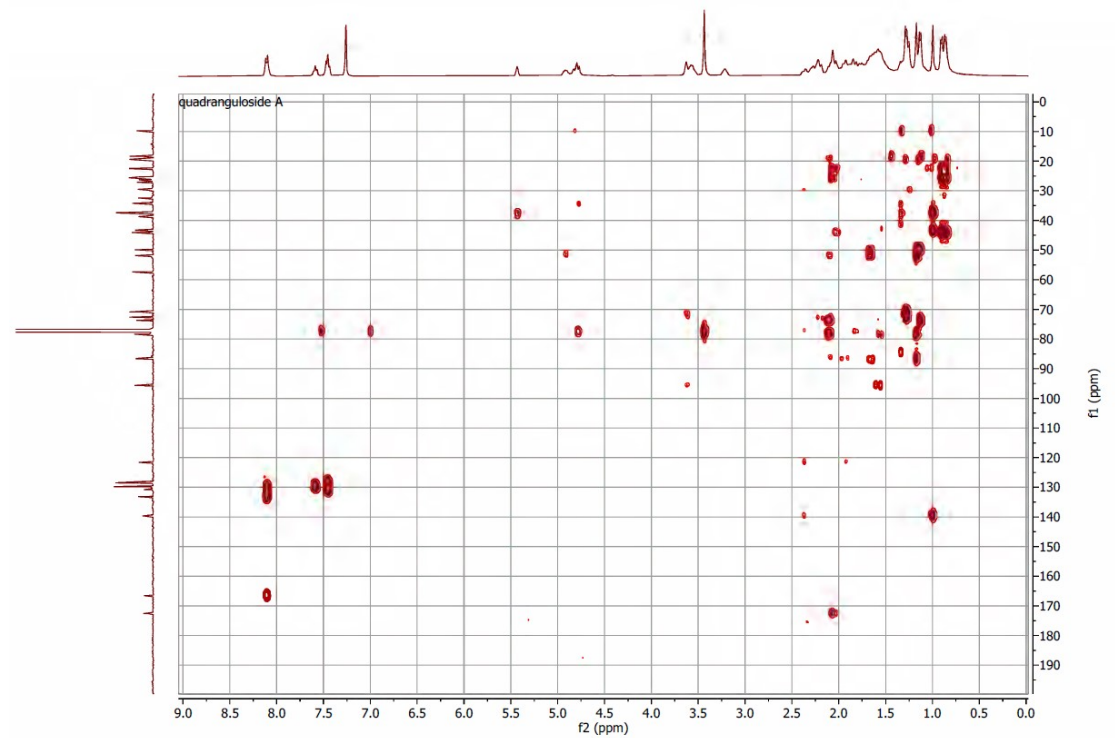

**HMBC of Compound 1**

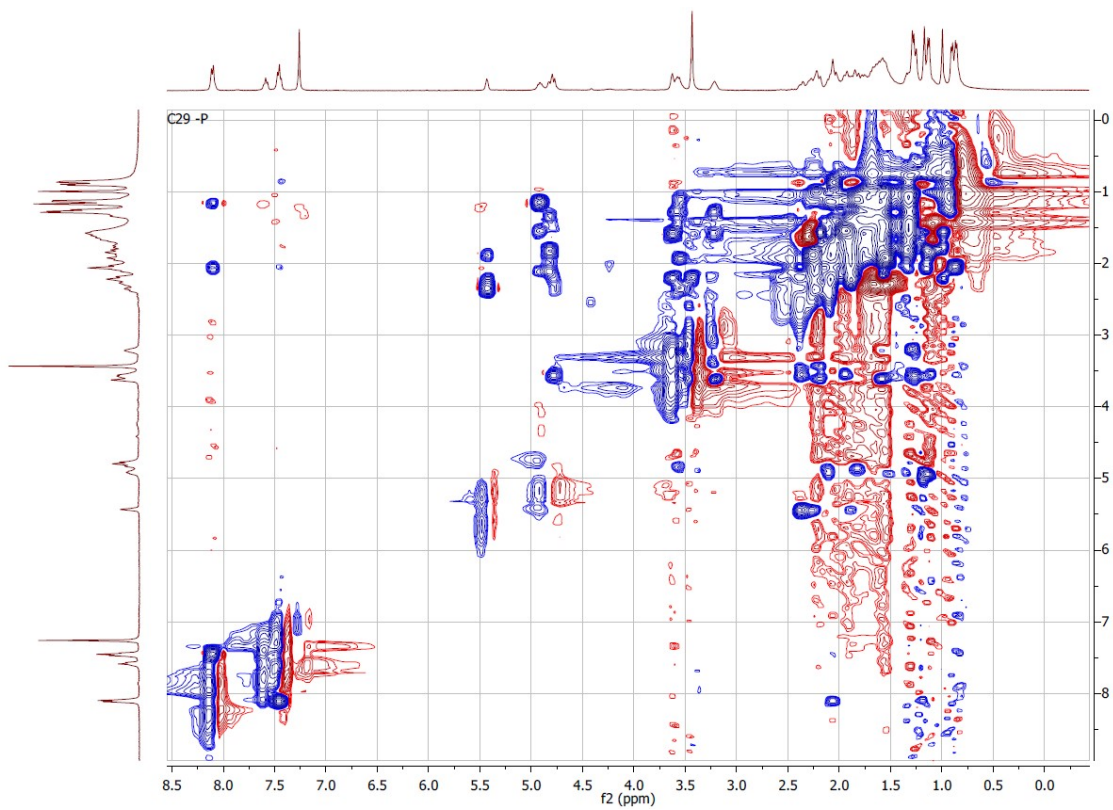

**Identification of compound 2**

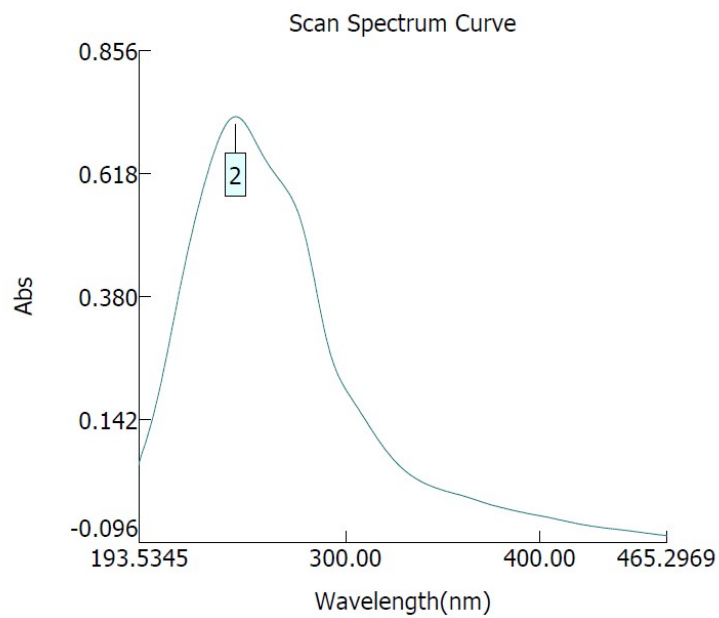





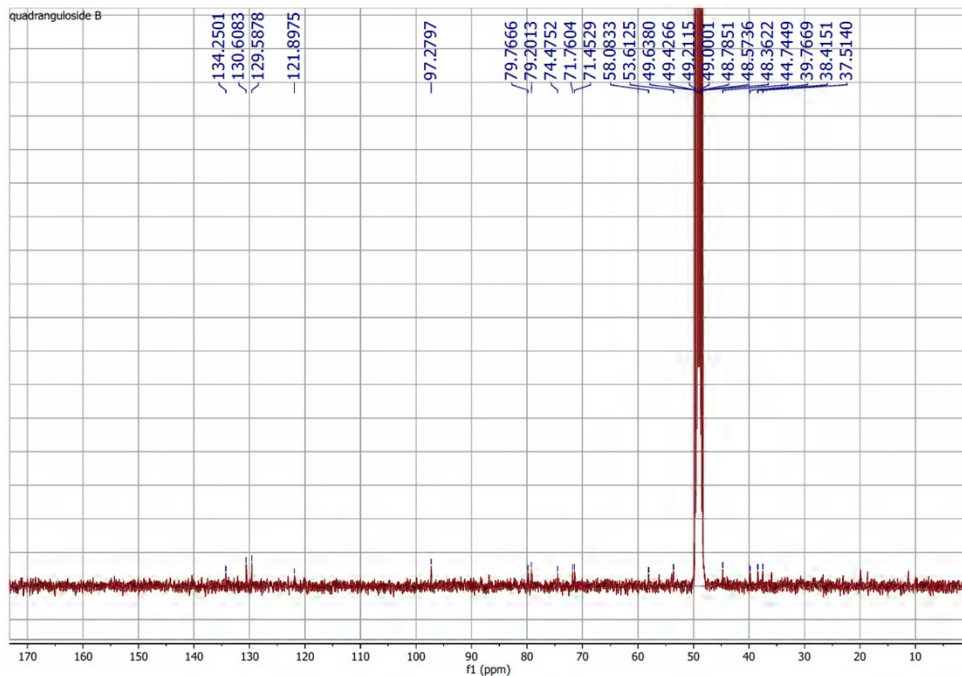

**$^{13}\text{C}$ -NMR of Compound 2**

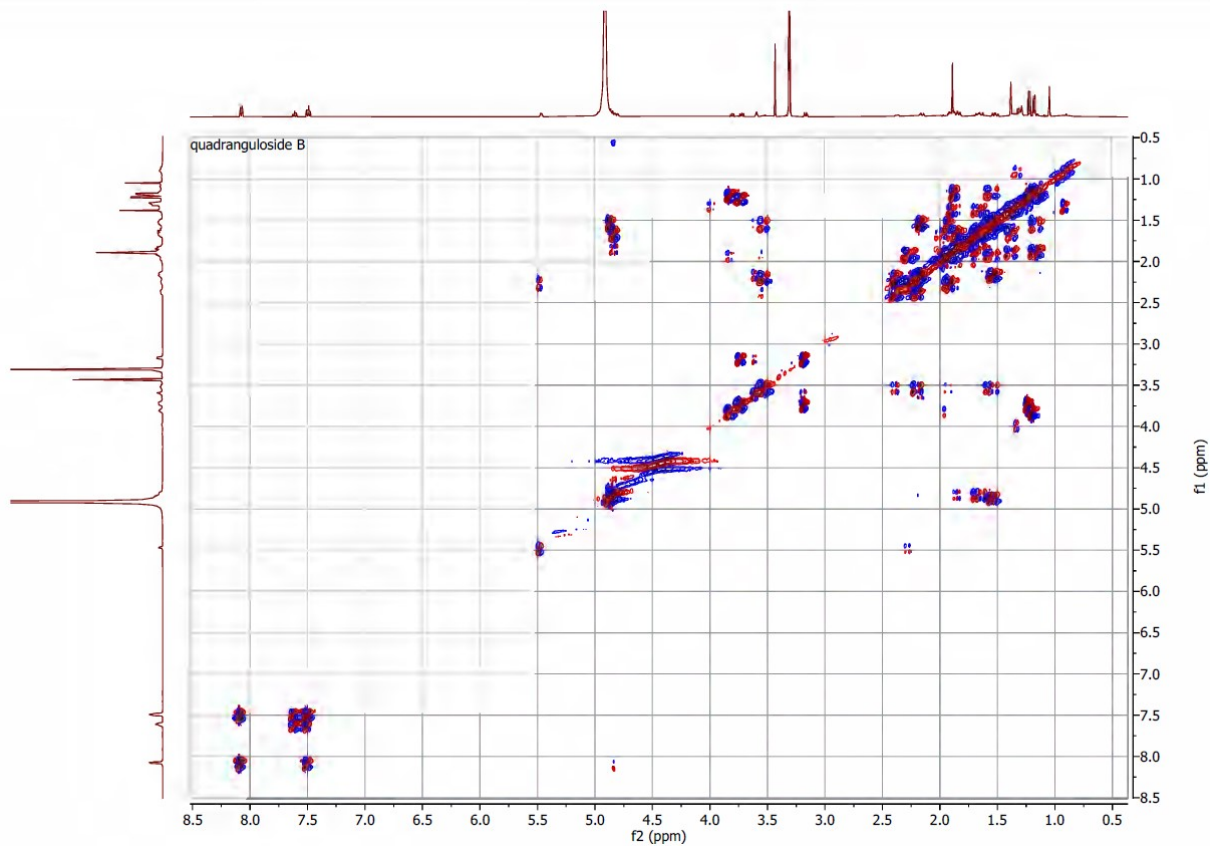

**H, H COSY of Compound 2**



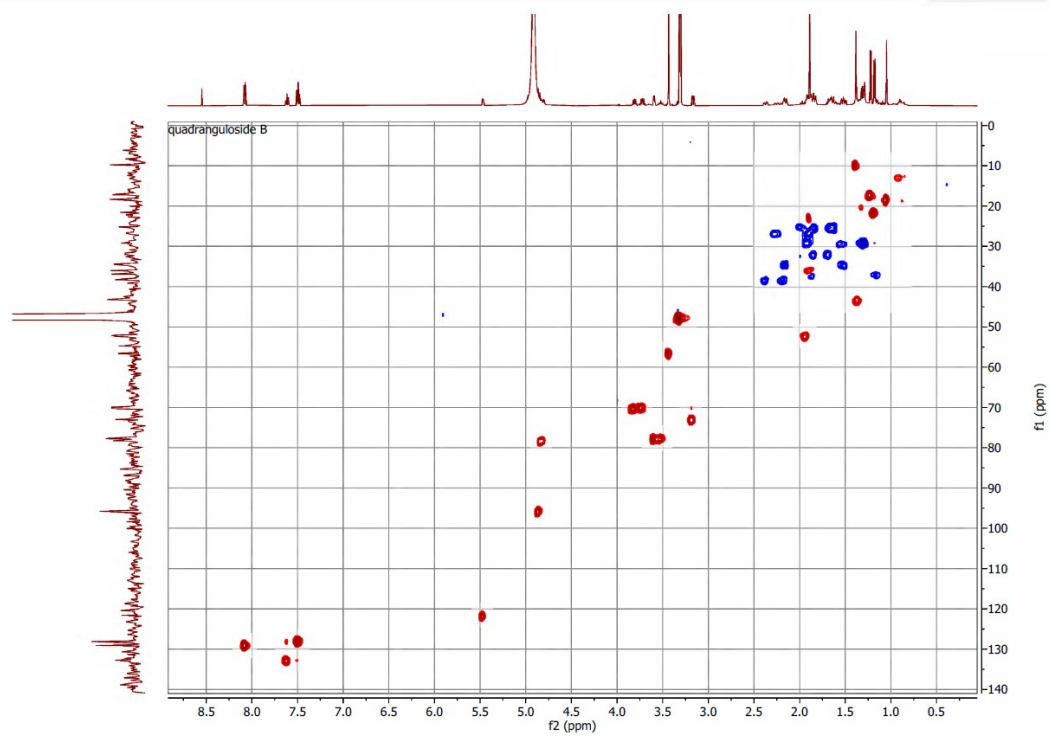

HSQC of Compound 2

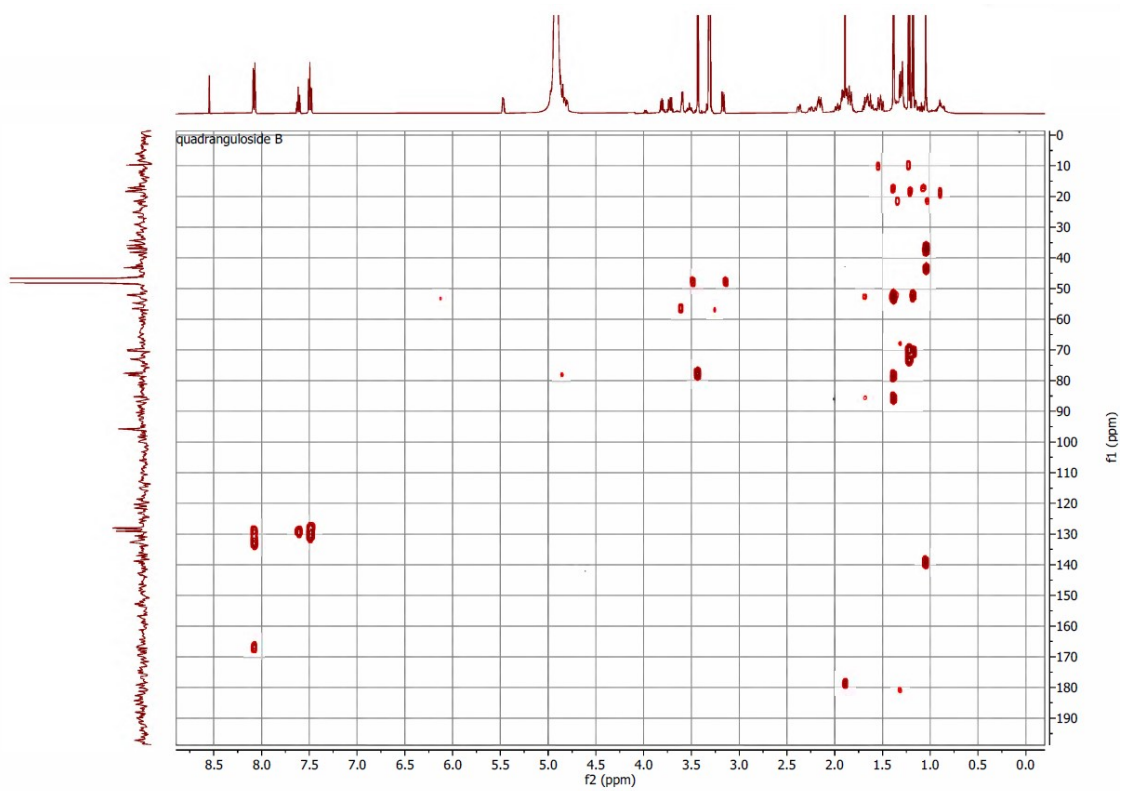

HMBC of Compound 2

### Identification of compound 3

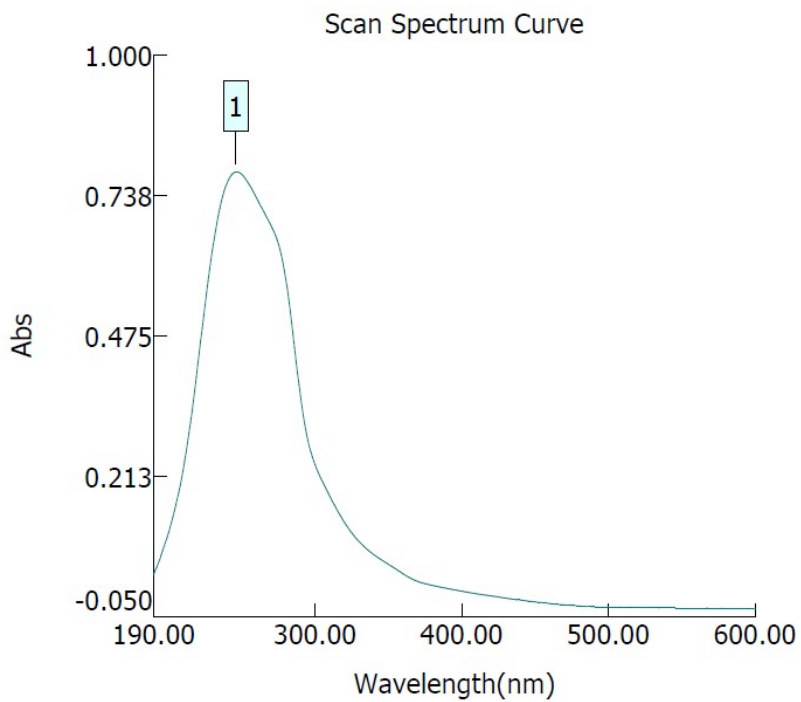

UV Spectra of Compound 3

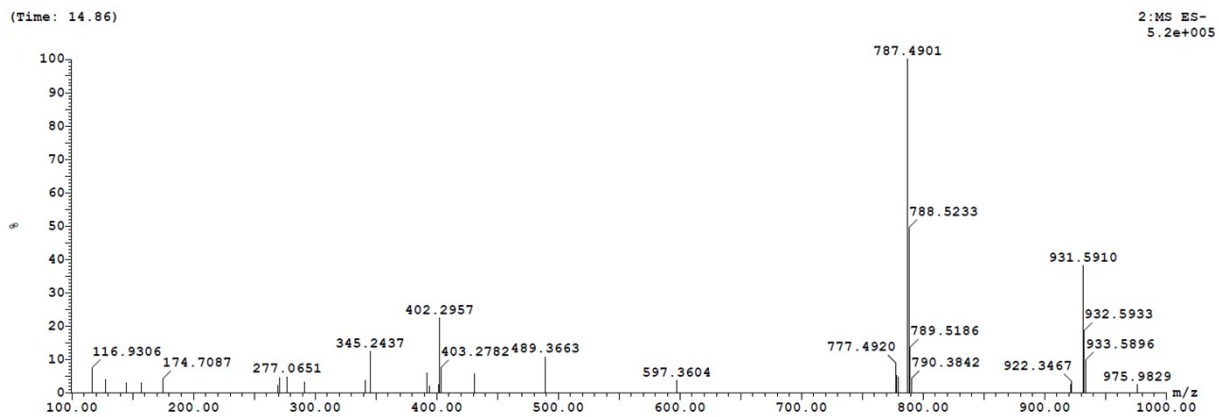

ESI-MS of compound 3

quadranguloside C

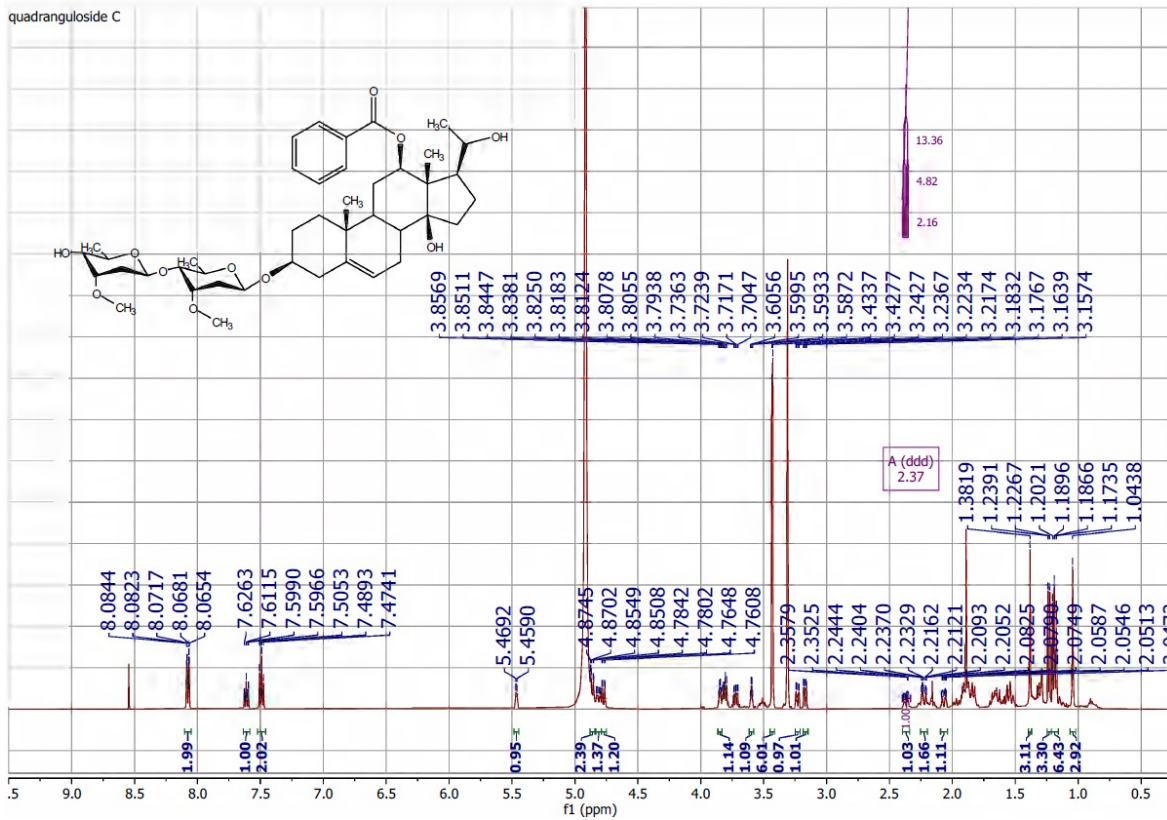

<sup>1</sup>H-NMR of Compound 3

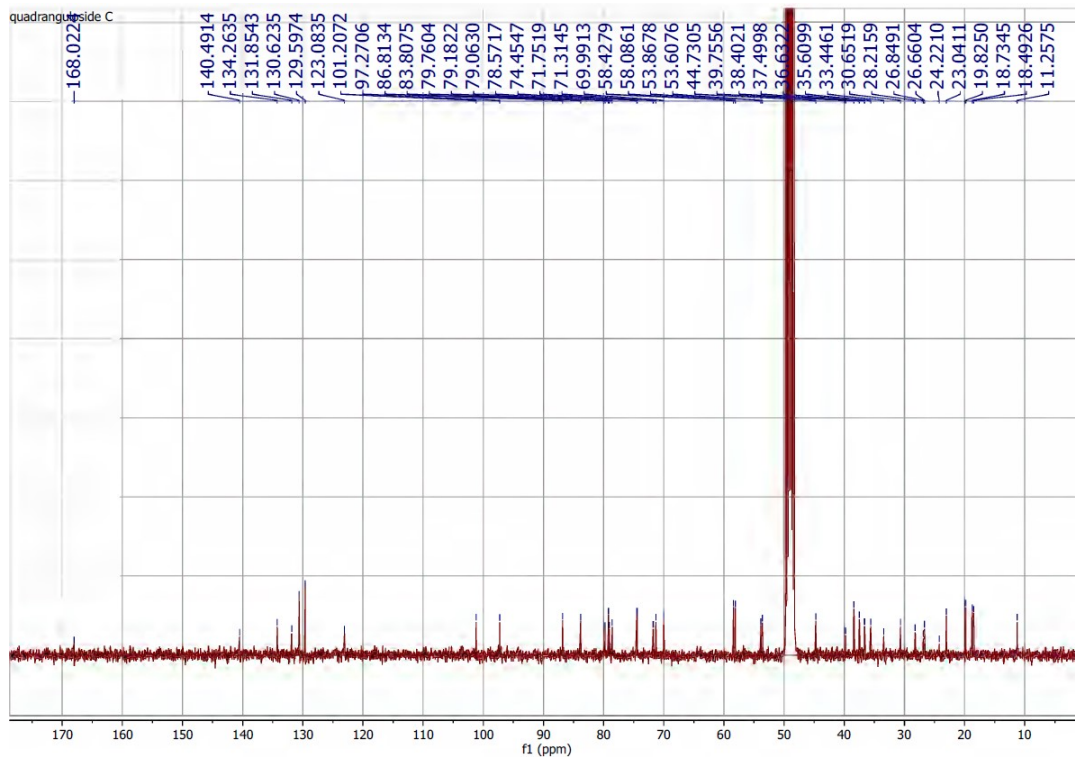

<sup>13</sup>C-NMR of Compound 3

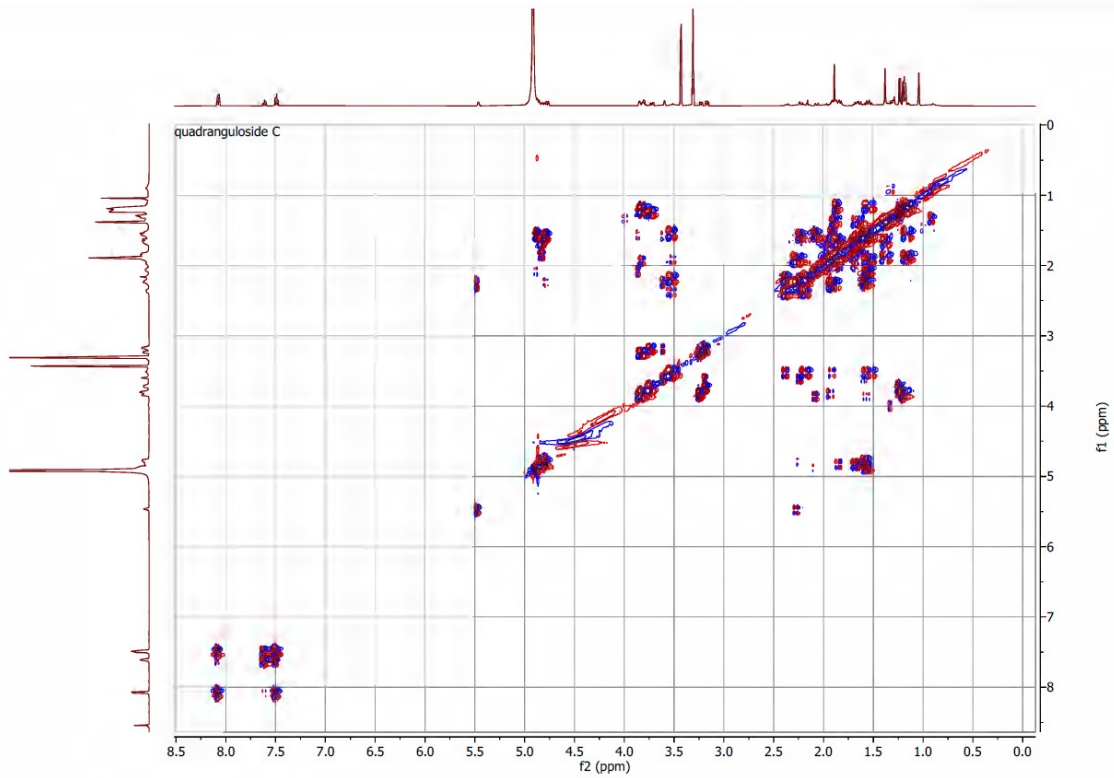

H, H COSY of Compound 3

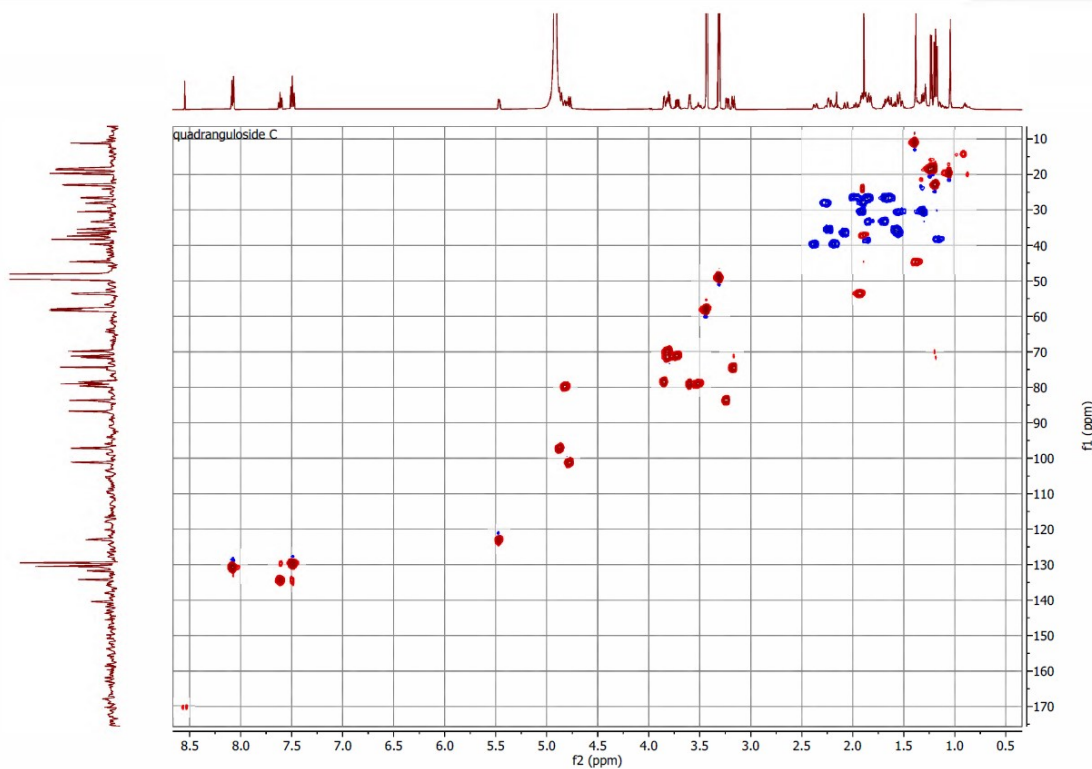

HSQC of Compound 3

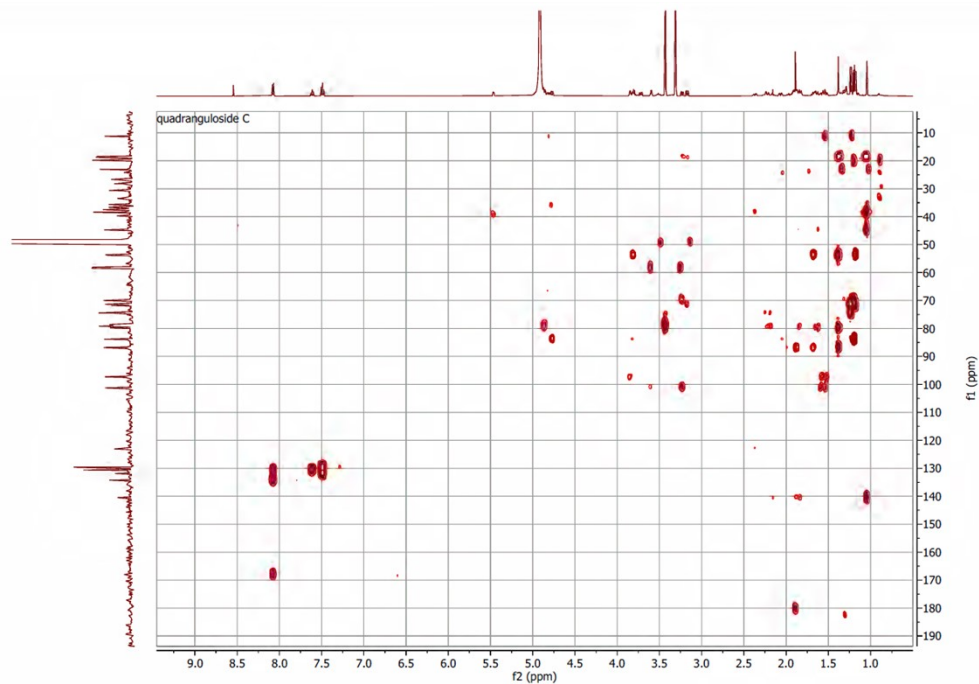

**HMBC of Compound 3**

**Identification of compound 4**

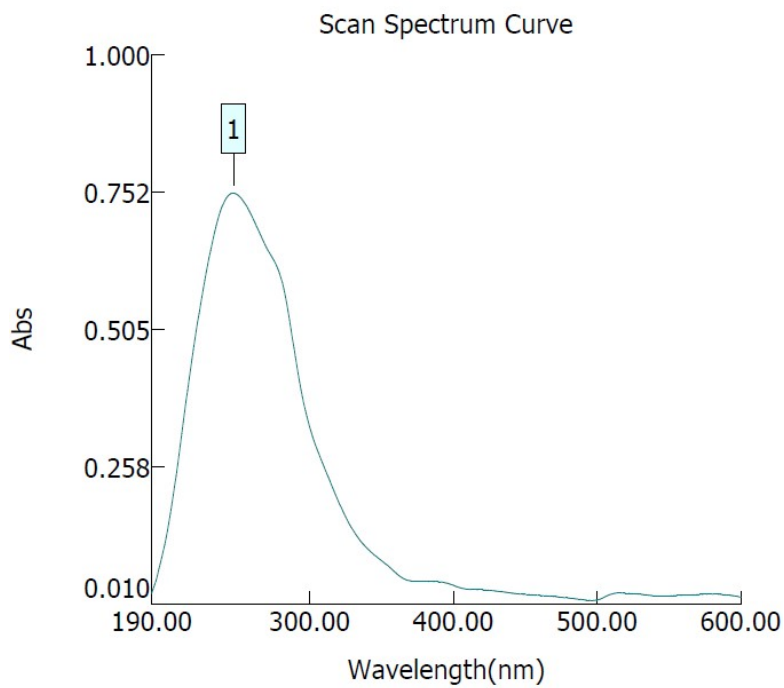

**UV Spectra of Compound 4**

(Time: 13.38)

2:MS ES-  
1.4e+006

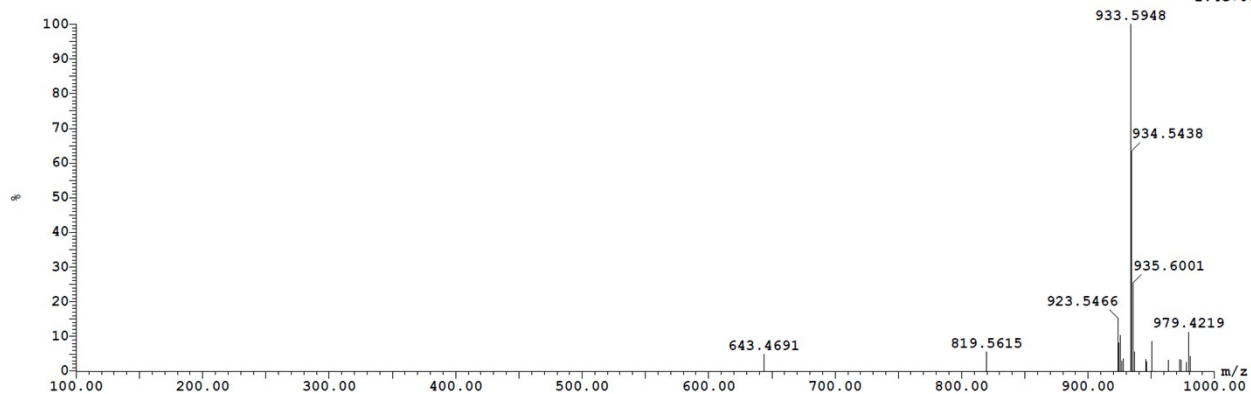

### ESI-MS of compound 4

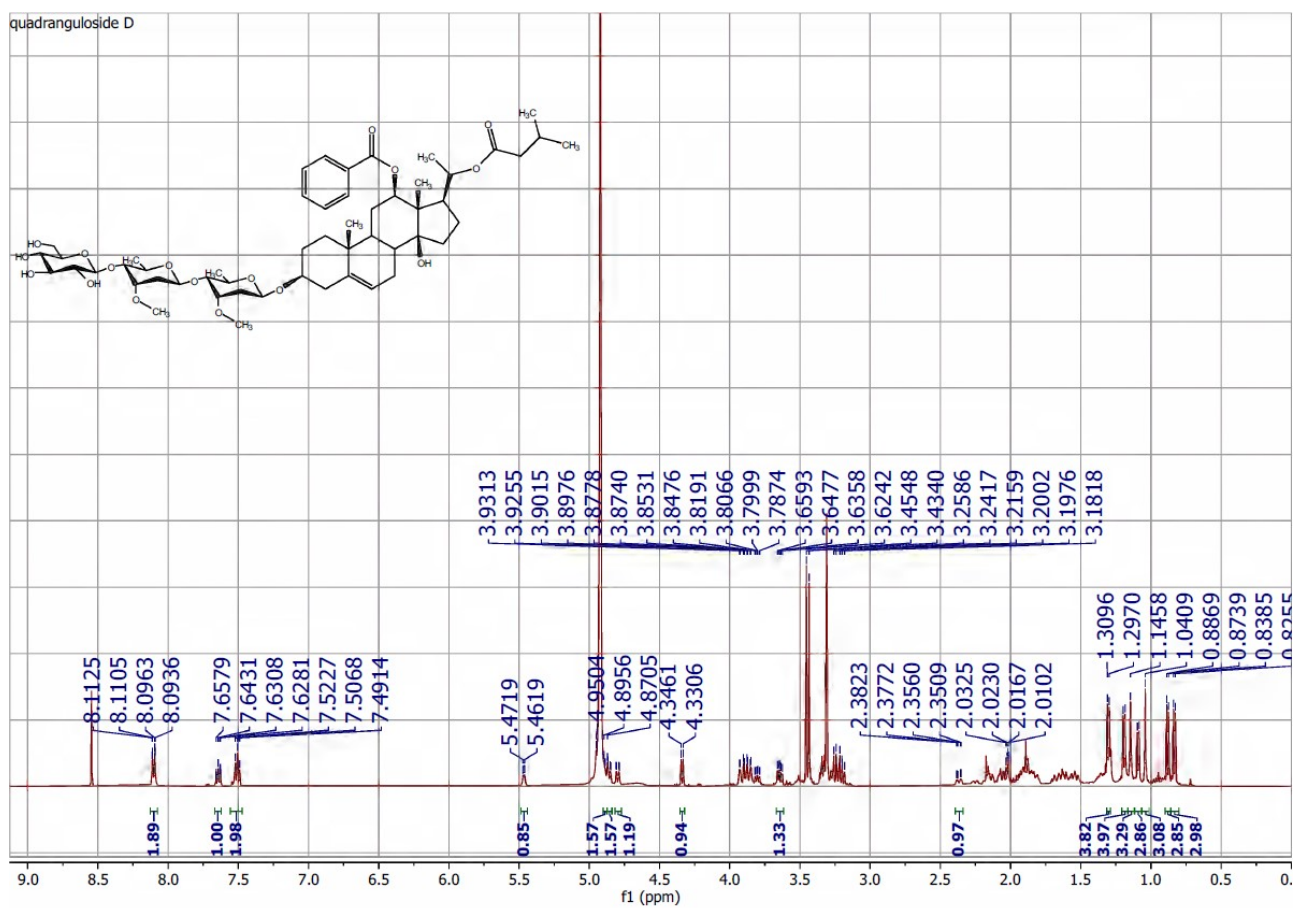

### 1H-NMR of Compound 4



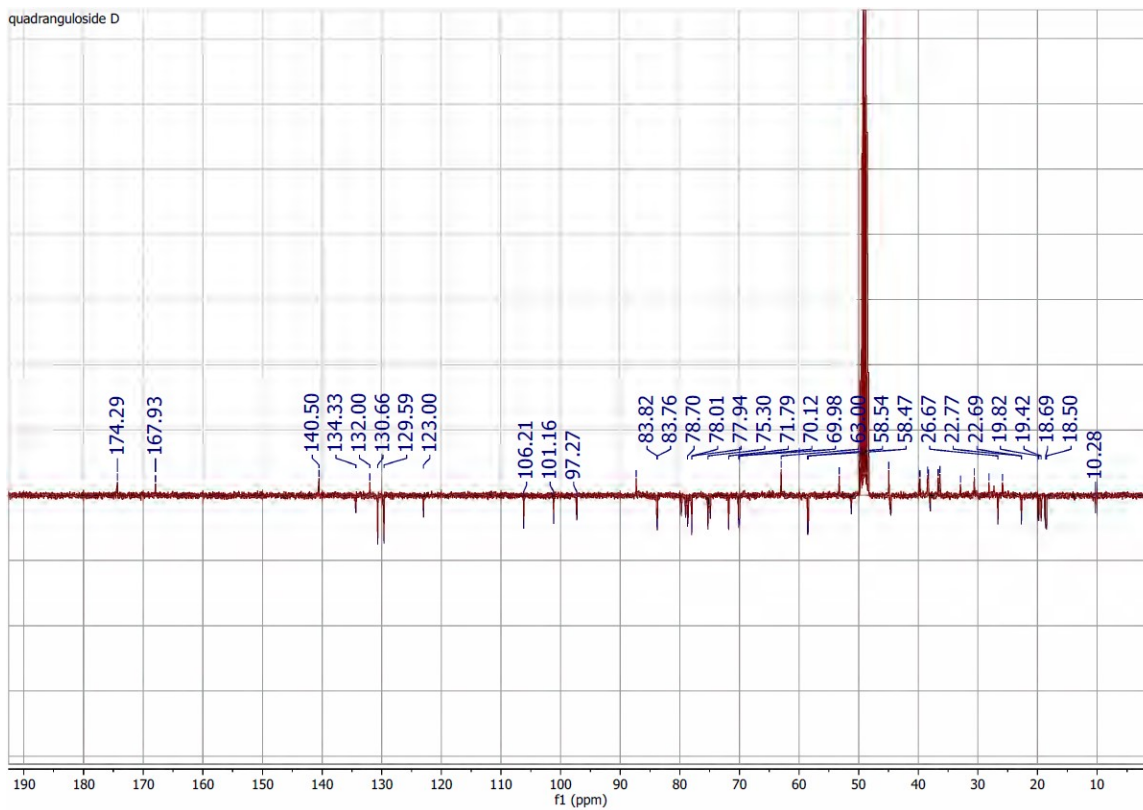

**<sup>13</sup>C-NMR of Compound 4**

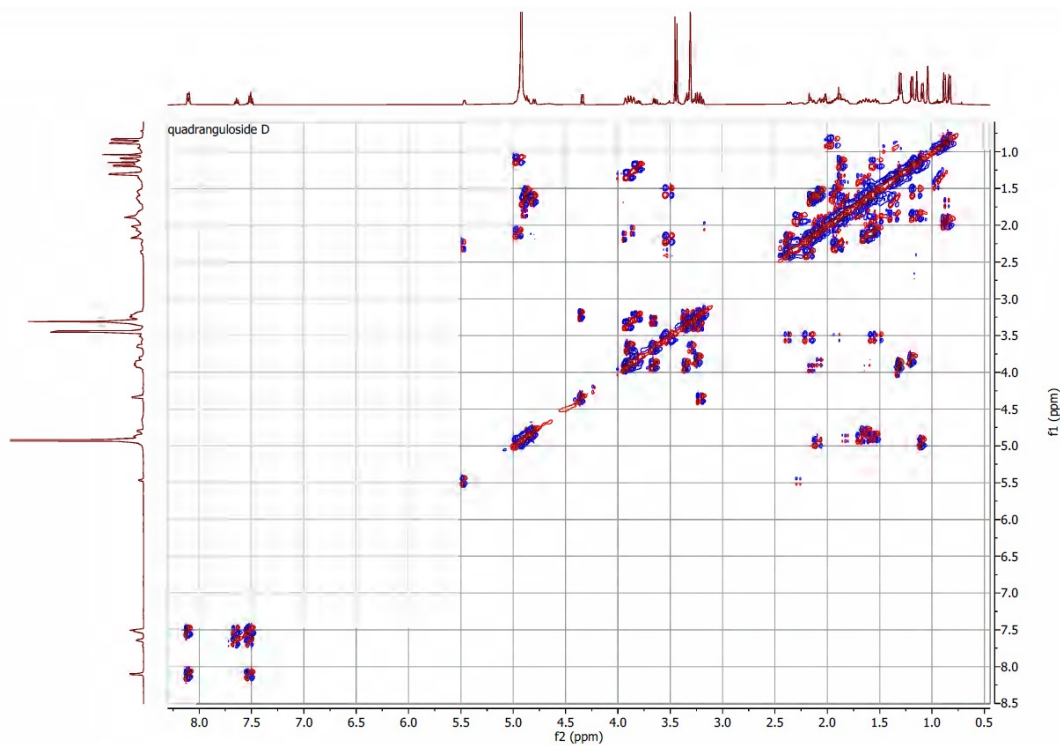

**H, H COSY of Compound 4**

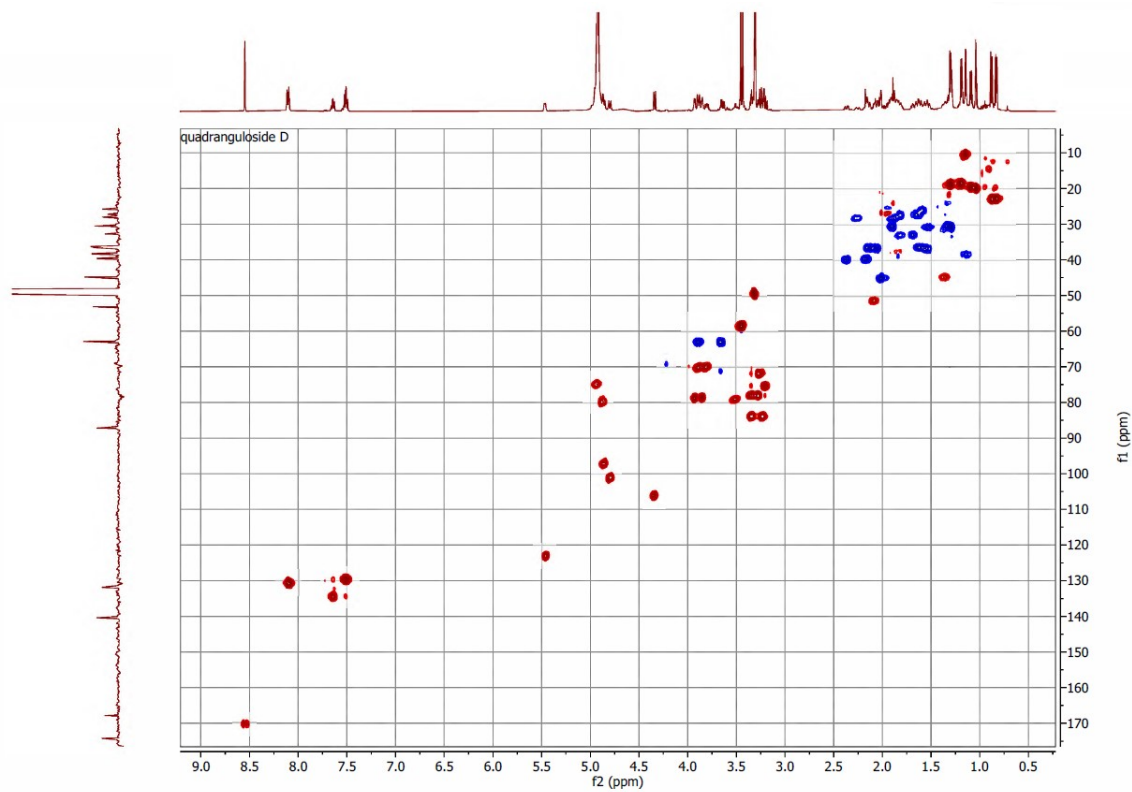

HSQC of Compound 4

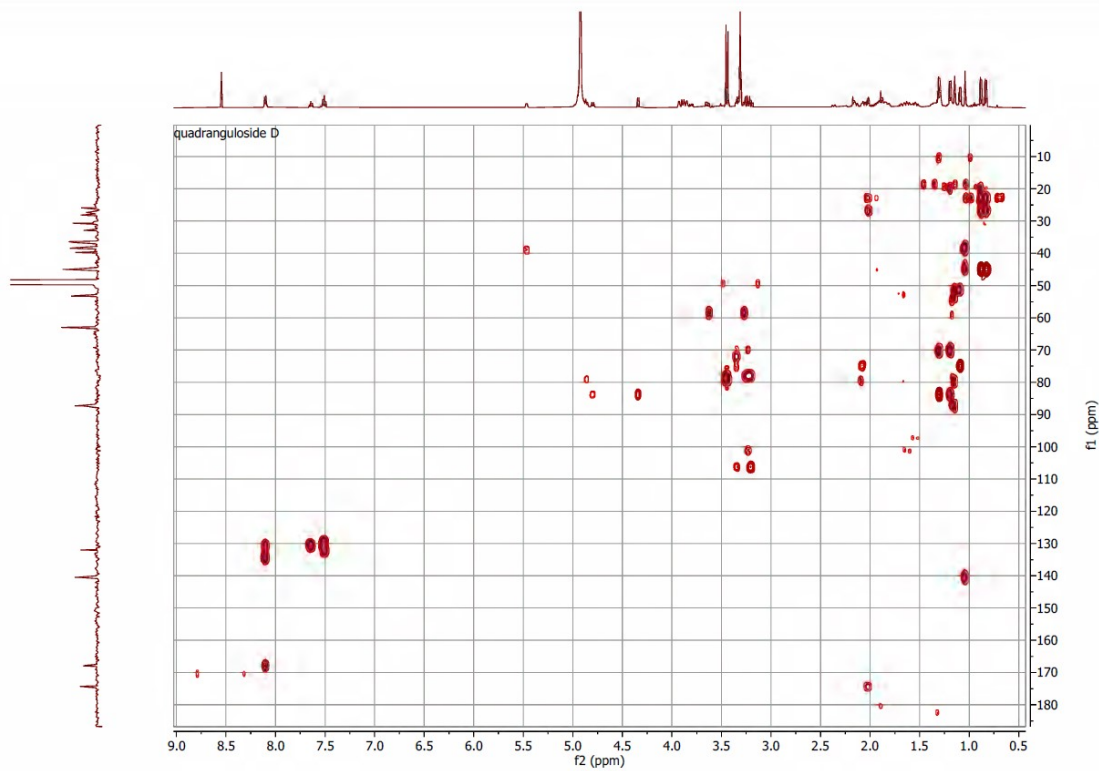

HMBC of Compound 4

## Identification of compound 5

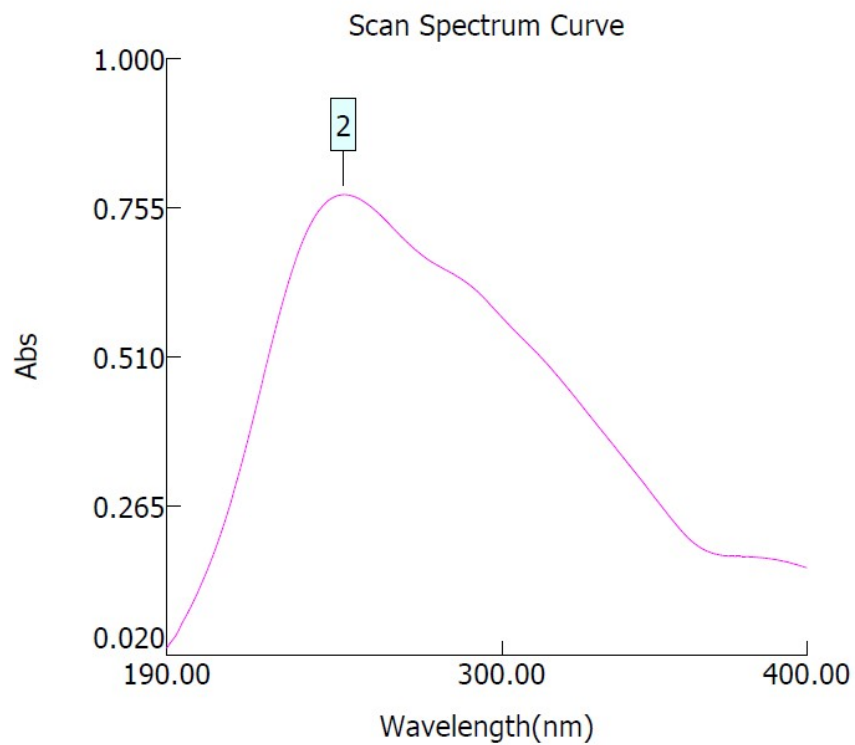

## UV Spectra of Compound 5

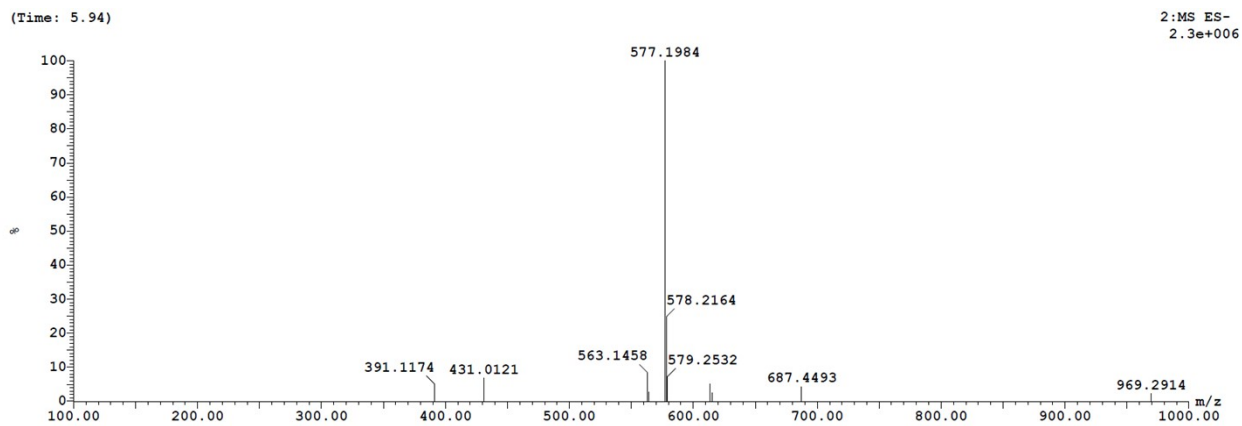

## ESI-MS of compound 5

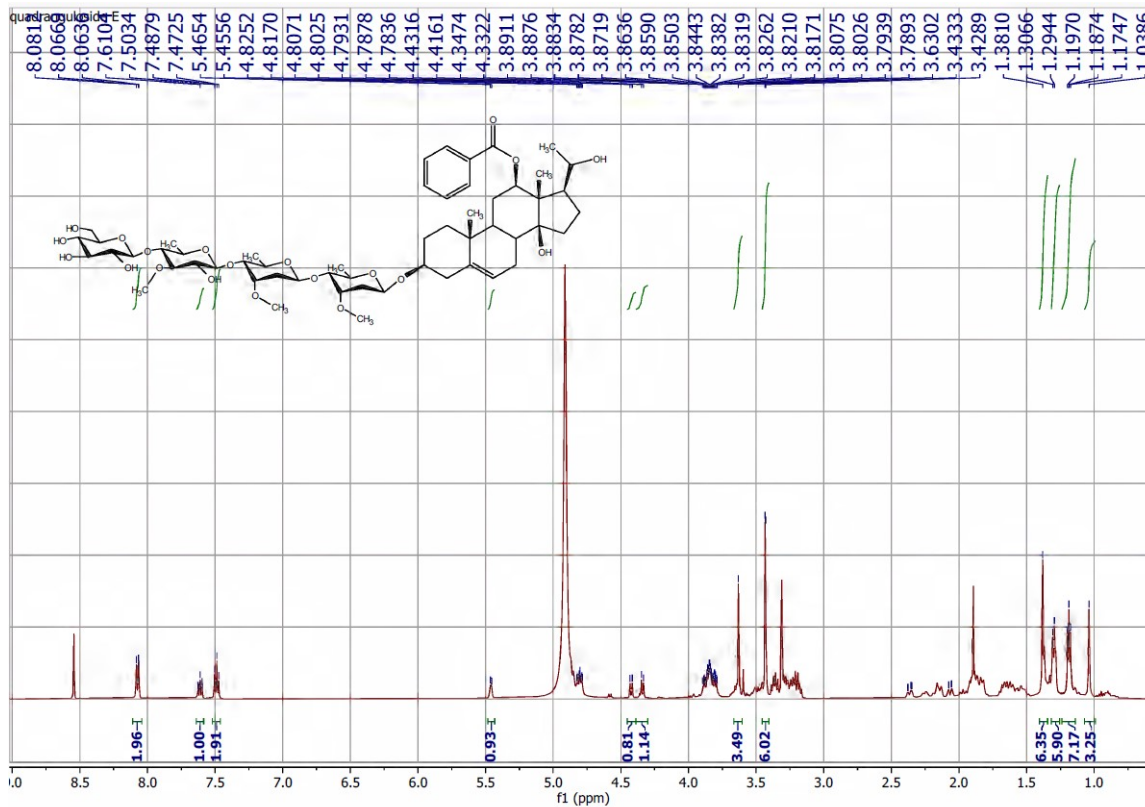

1H-NMR of Compound 5

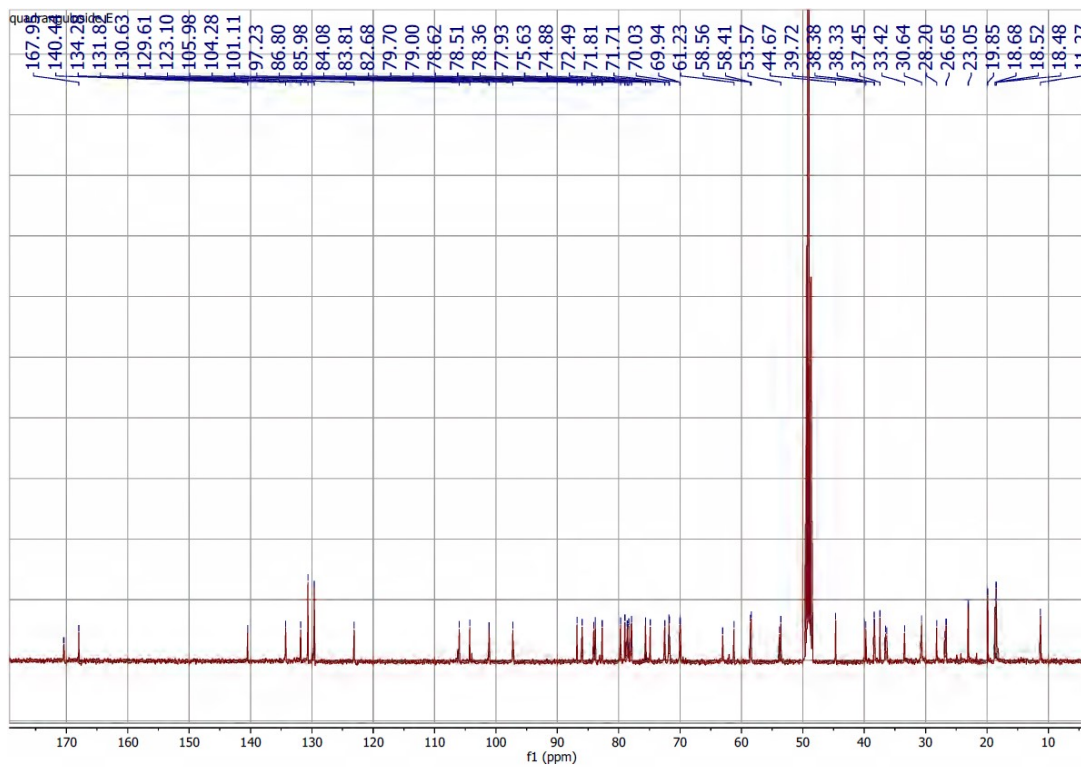

13C-NMR of Compound 5

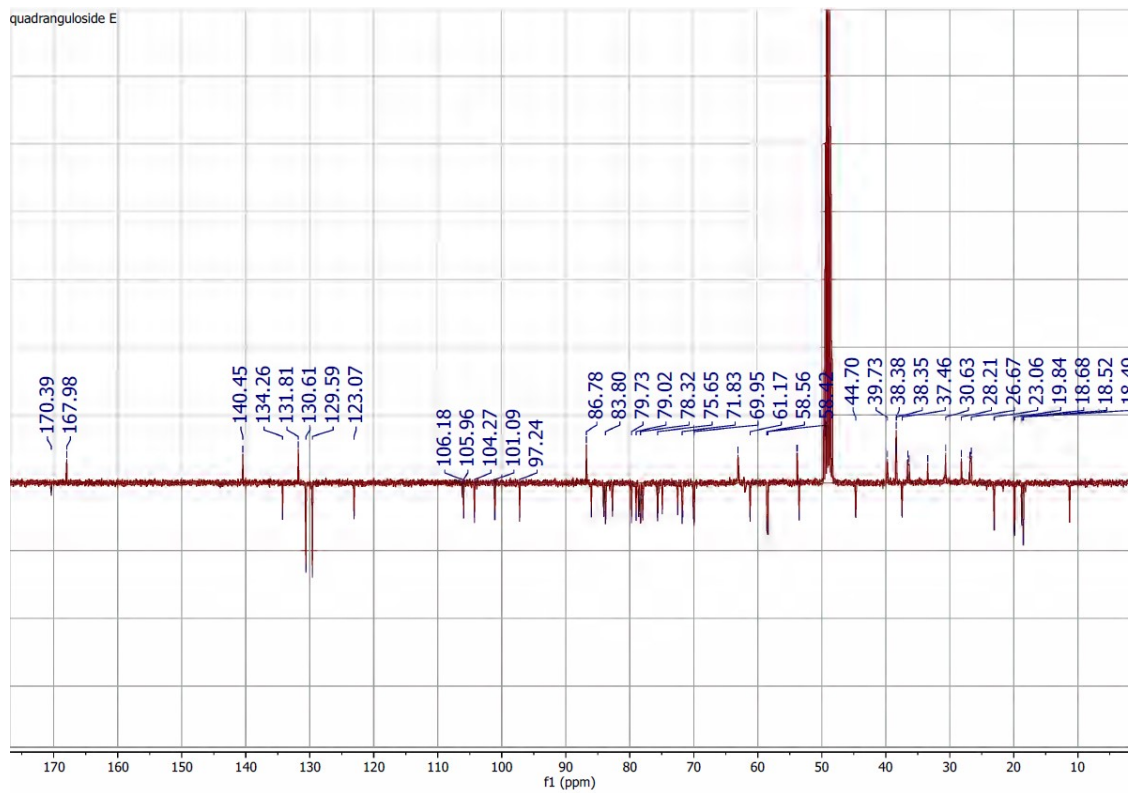

APT  $^{13}\text{C}$ -NMR of Compound 5

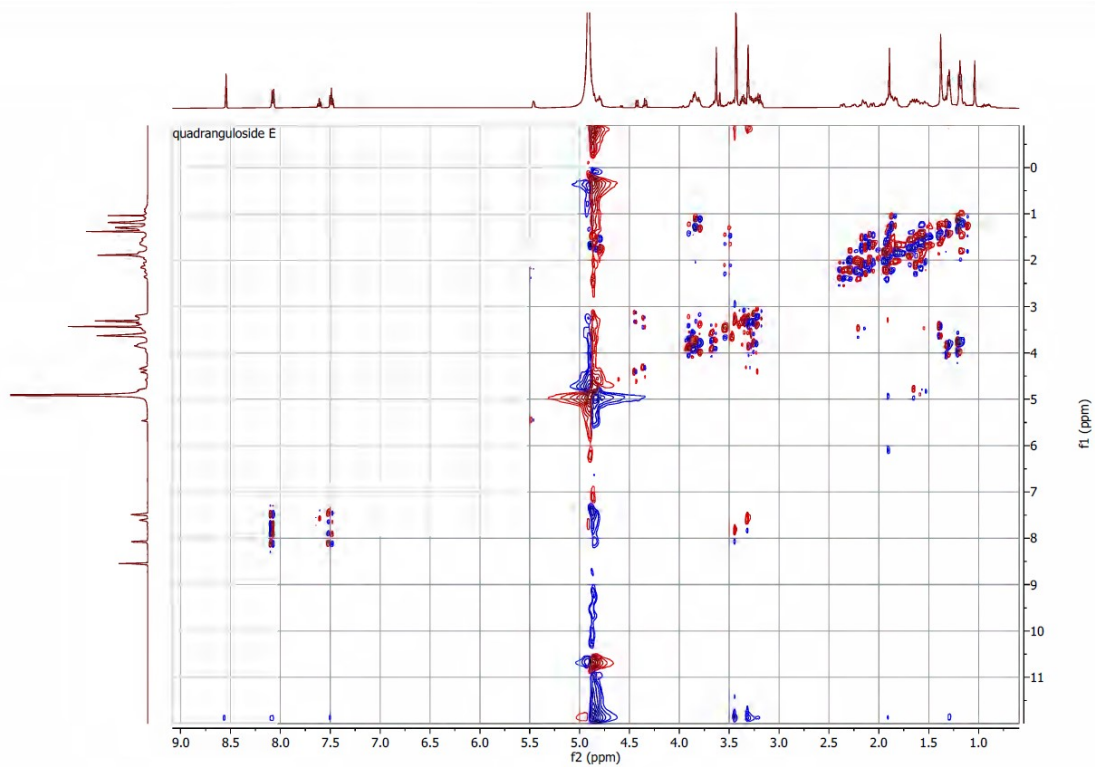

H, H COSY of Compound 5



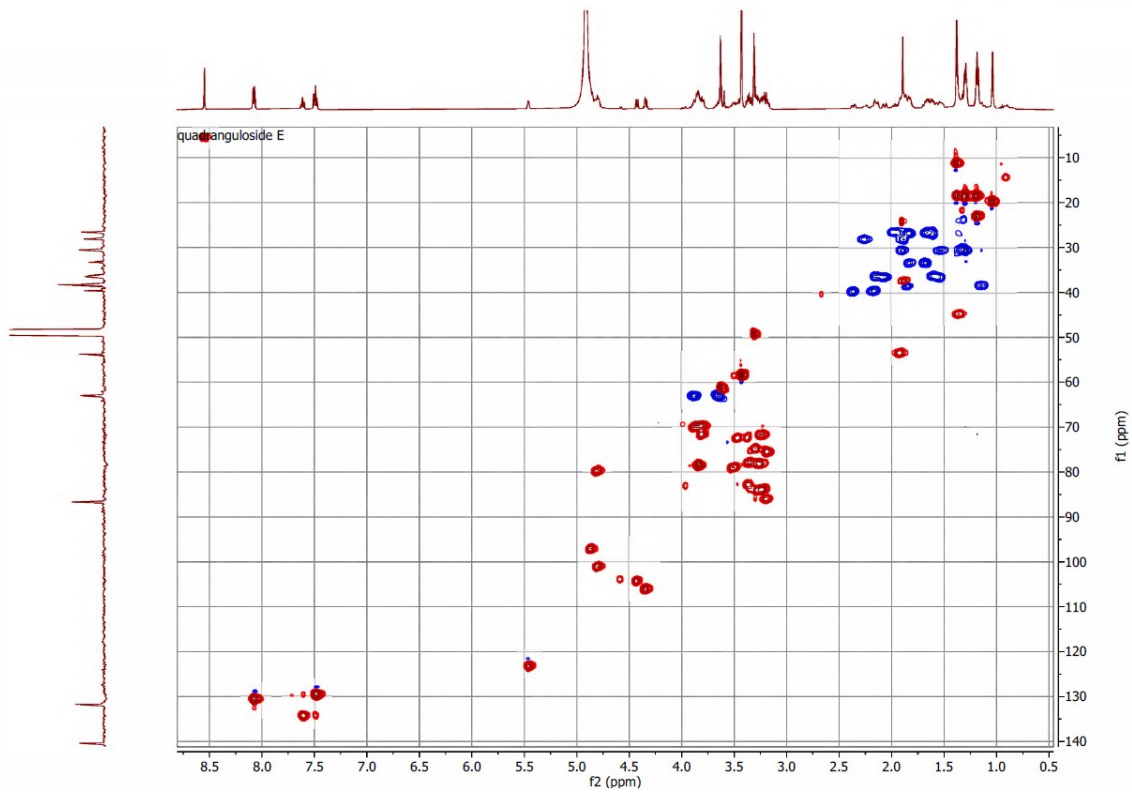

HSQC of Compound 5

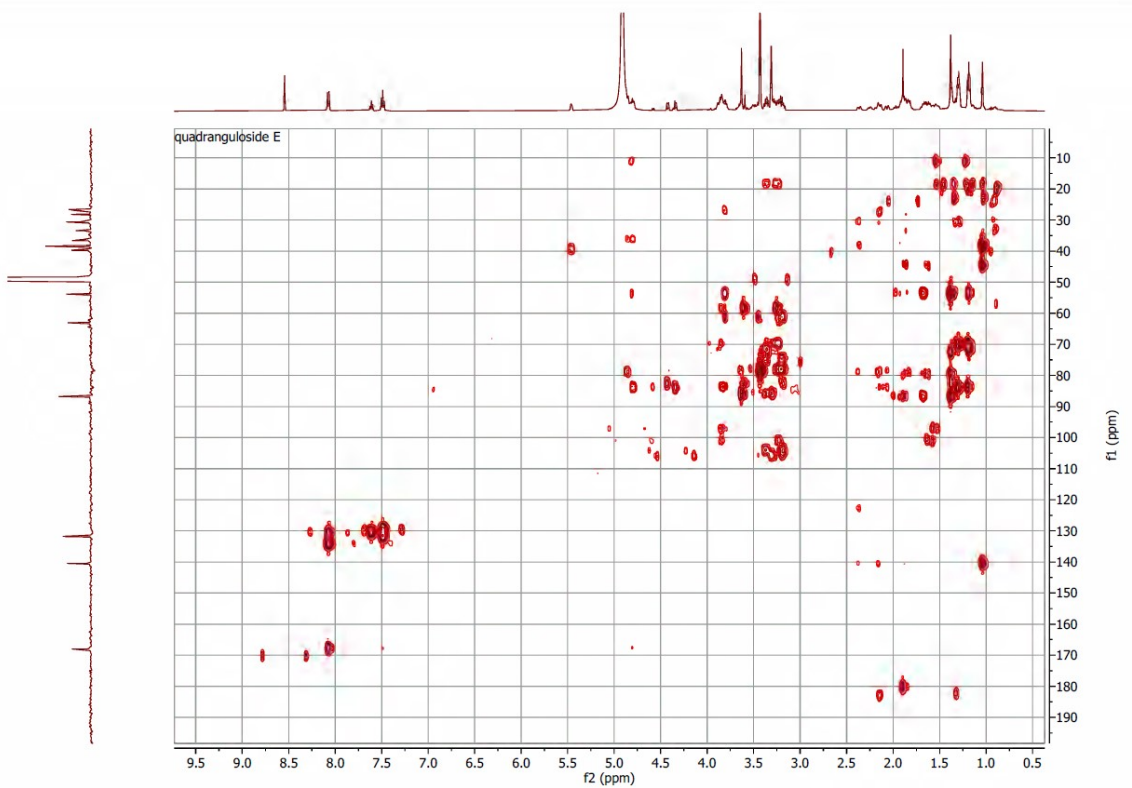

HMBC of Compound 5



## Identification of compound 5

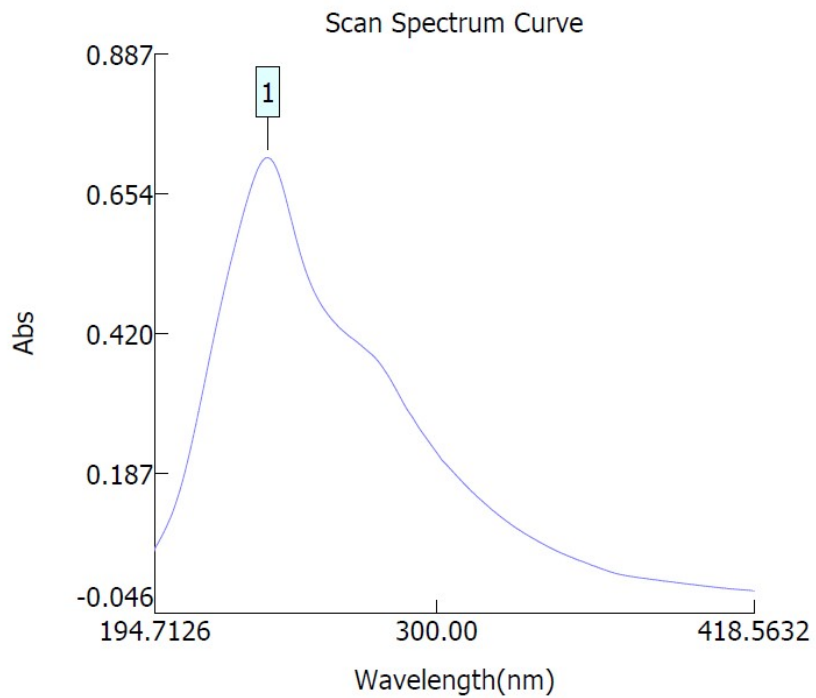

## UV Spectra of Compound 6

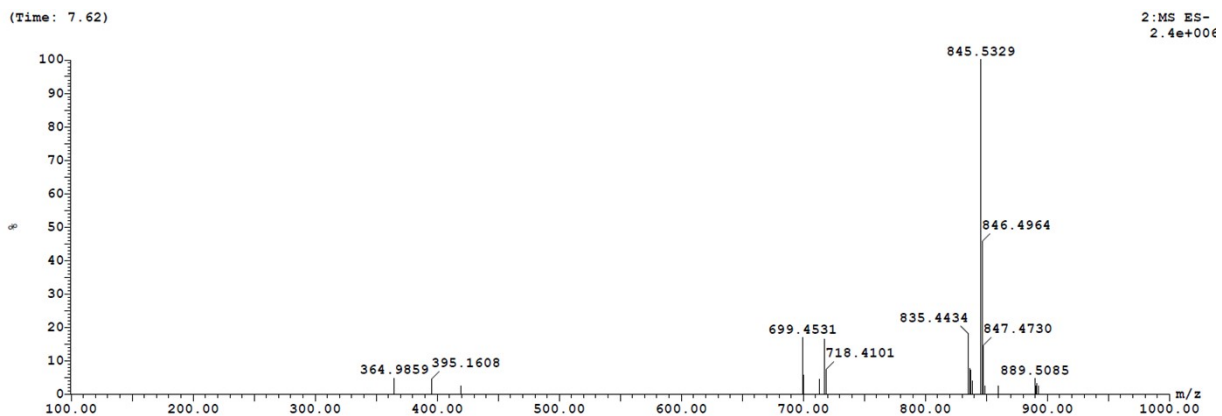

## ESI-MS of compound 6

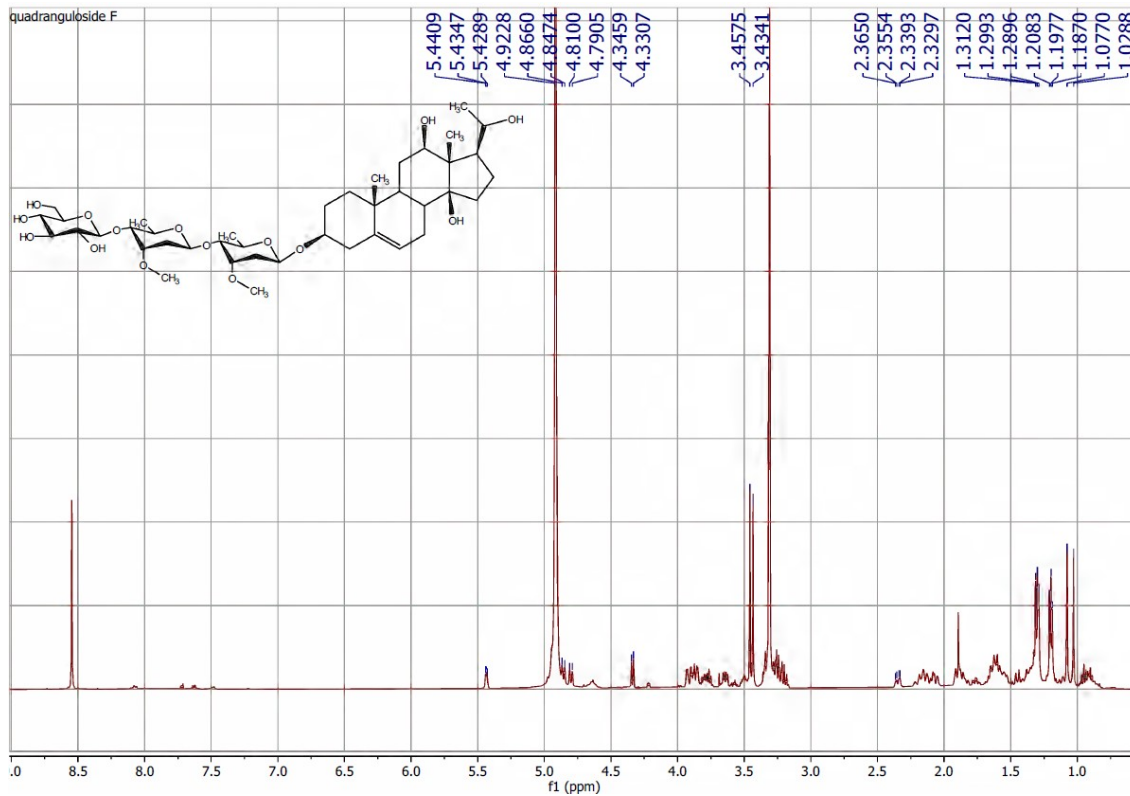

**<sup>1</sup>H-NMR of Compound 6**

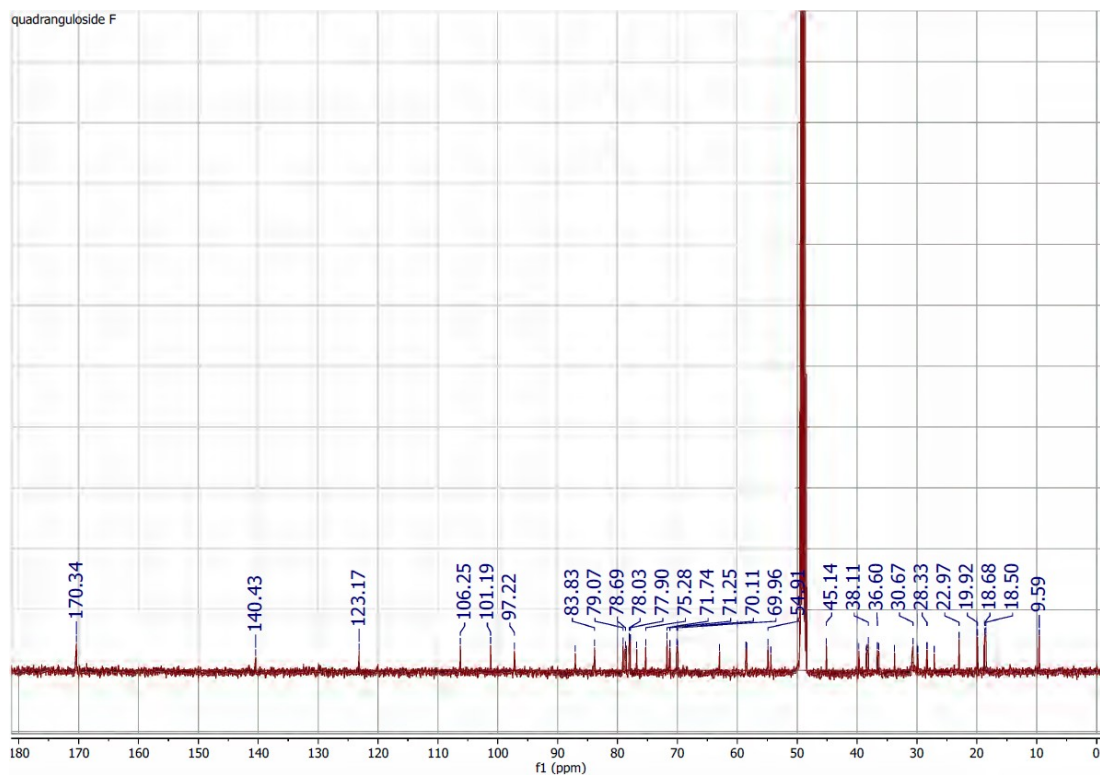

**<sup>13</sup>C-NMR of Compound 6**

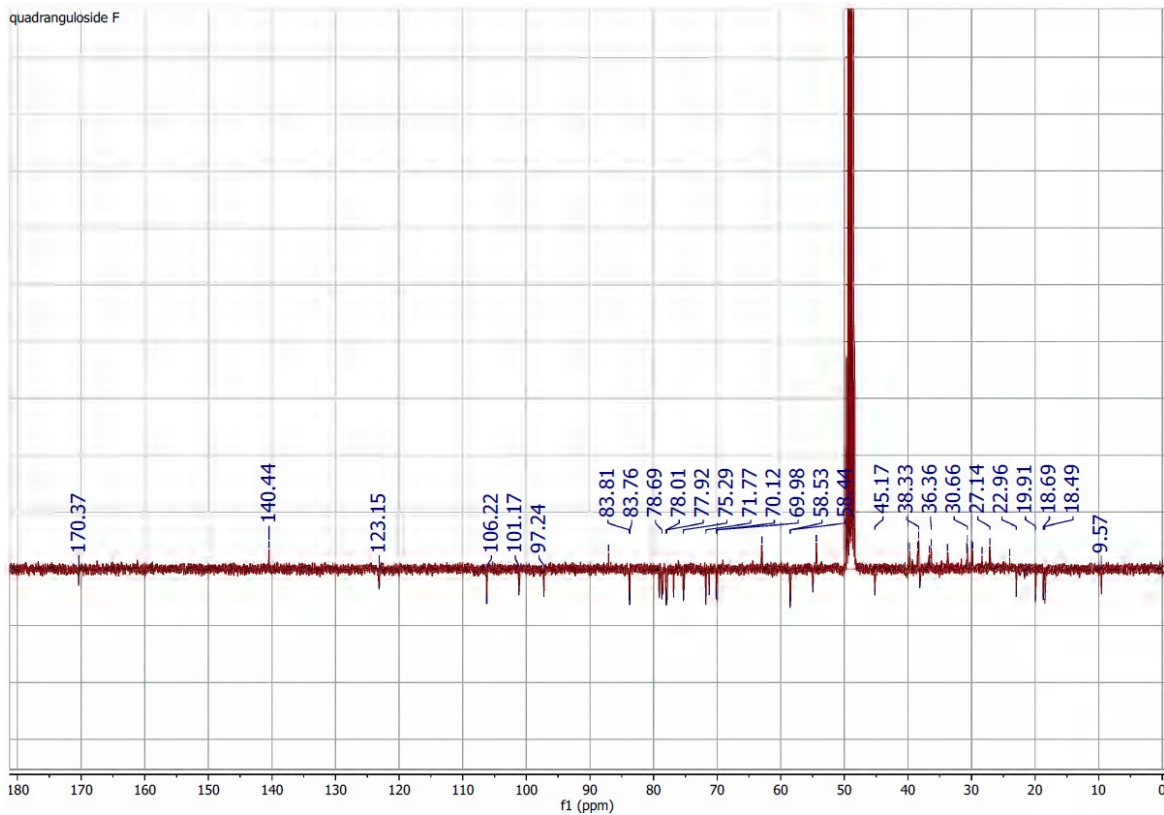

APT  $^{13}\text{C}$ -NMR of Compound 6

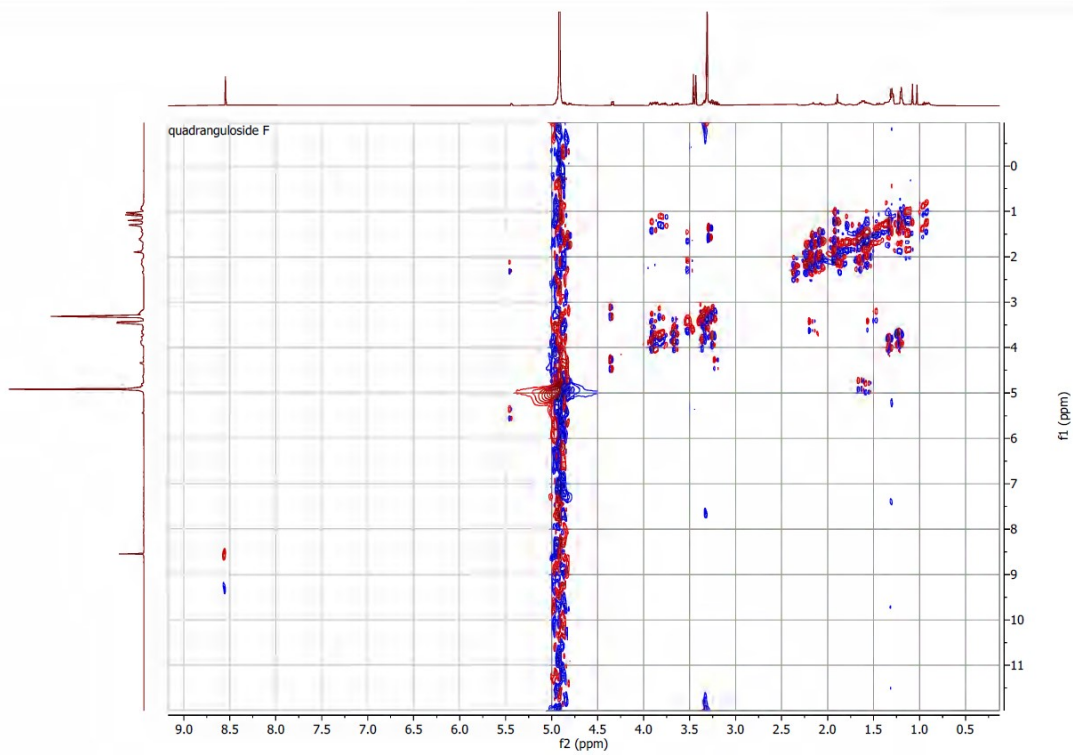

H, H COSY of Compound 6

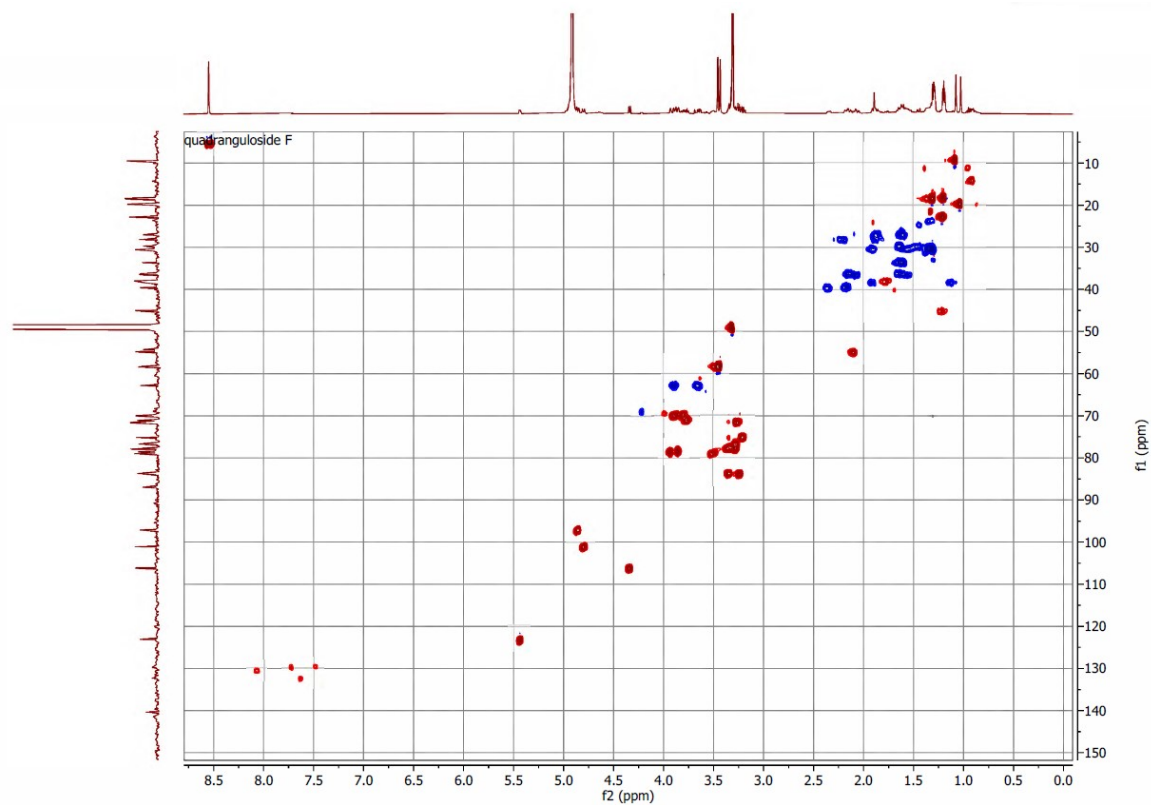

HSQC of Compound 6

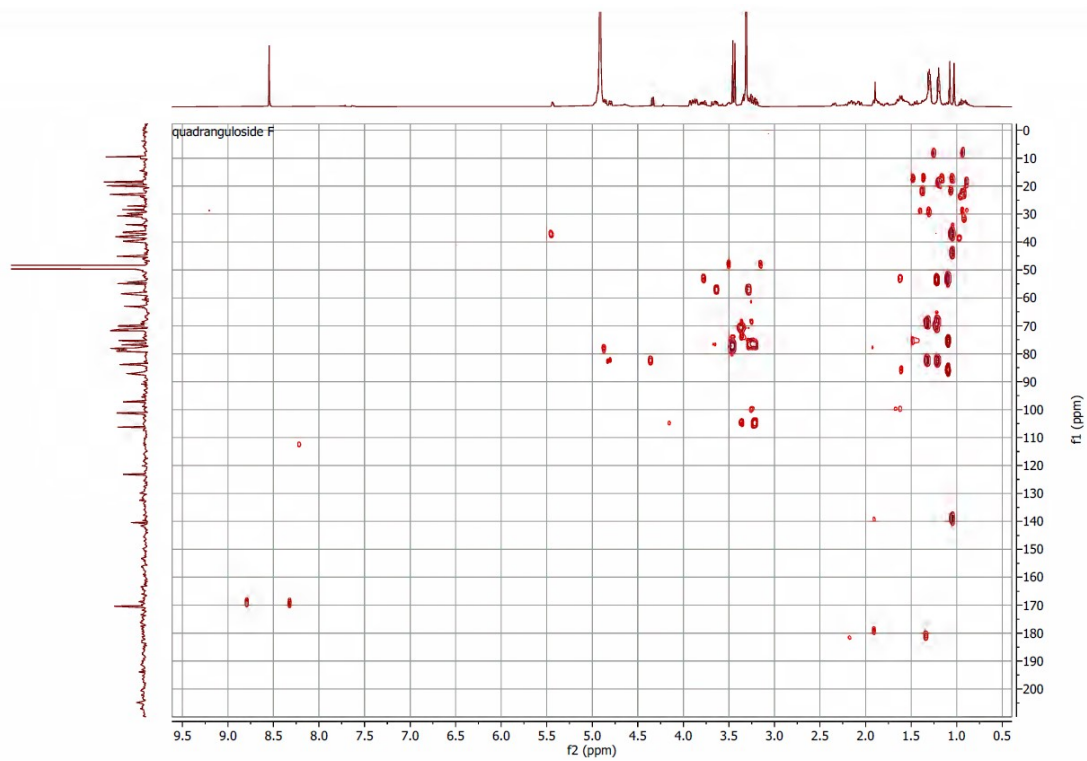

HMBC of Compound 6
